# Supplementary material for: Copper(ii) bromide as a procatalyst for in situ preparation of active Cu nanoparticles for reduction of nitroarenes
Source: Royal Society of Chemistry journal article supplement (doi:10.1039/c2ra20371e), 2012-01-01

**Supporting Information**

**Copper (II) bromide as a Procatalyst for *in situ* Preparation of Active Cu Nanoparticles for Reduction of Nitroarenes**

*Hari K. Kadam and Santosh G. Tilve\**

*Department of Chemistry, Goa University, Taleigao Plateau, Goa – 403206, India  
\*Tel: +91-832-6519317, Fax: +91-832-2452886. E-mail: stilve@unigoa.ac.in.*

Table of Content

| Sr. No. | Title                                                                                      | Page no. |
|---------|--------------------------------------------------------------------------------------------|----------|
| 1       | <b><u>H<sup>1</sup>NMR of selected products</u></b>                                        | 2-5      |
| 2       | <b><u>EDX of recovered Cu catalyst</u></b>                                                 | 6-10     |
| 3       | <b><u>SEM of recovered Cu catalyst</u></b>                                                 | 11-23    |
| 4       | <b><u>XRD of recovered Cu Catalyst after nitroreduction and without nitroreduction</u></b> | 24-26    |
| 5       | <b><u>TEM of recovered Cu catalyst after nitroreduction</u></b>                            | 27-35    |

## **$^1\text{H}$ NMR of selected products**

Table 4, Entry 12

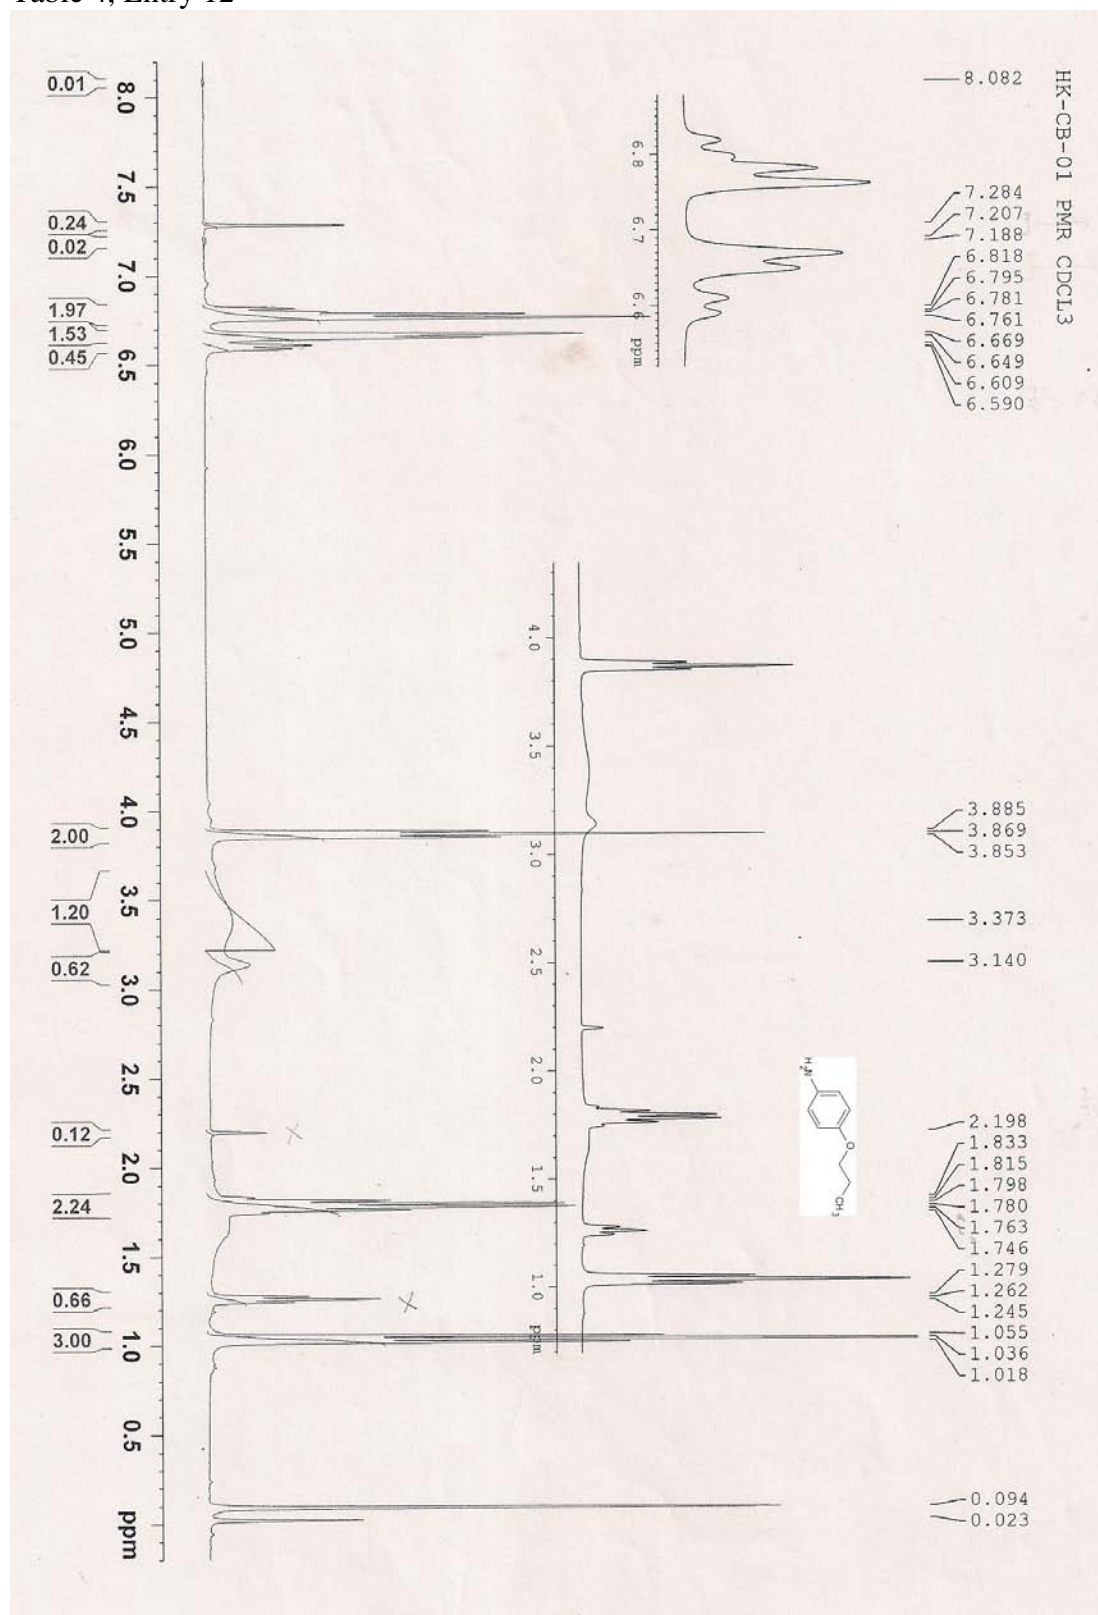

Table 4, Entry 13

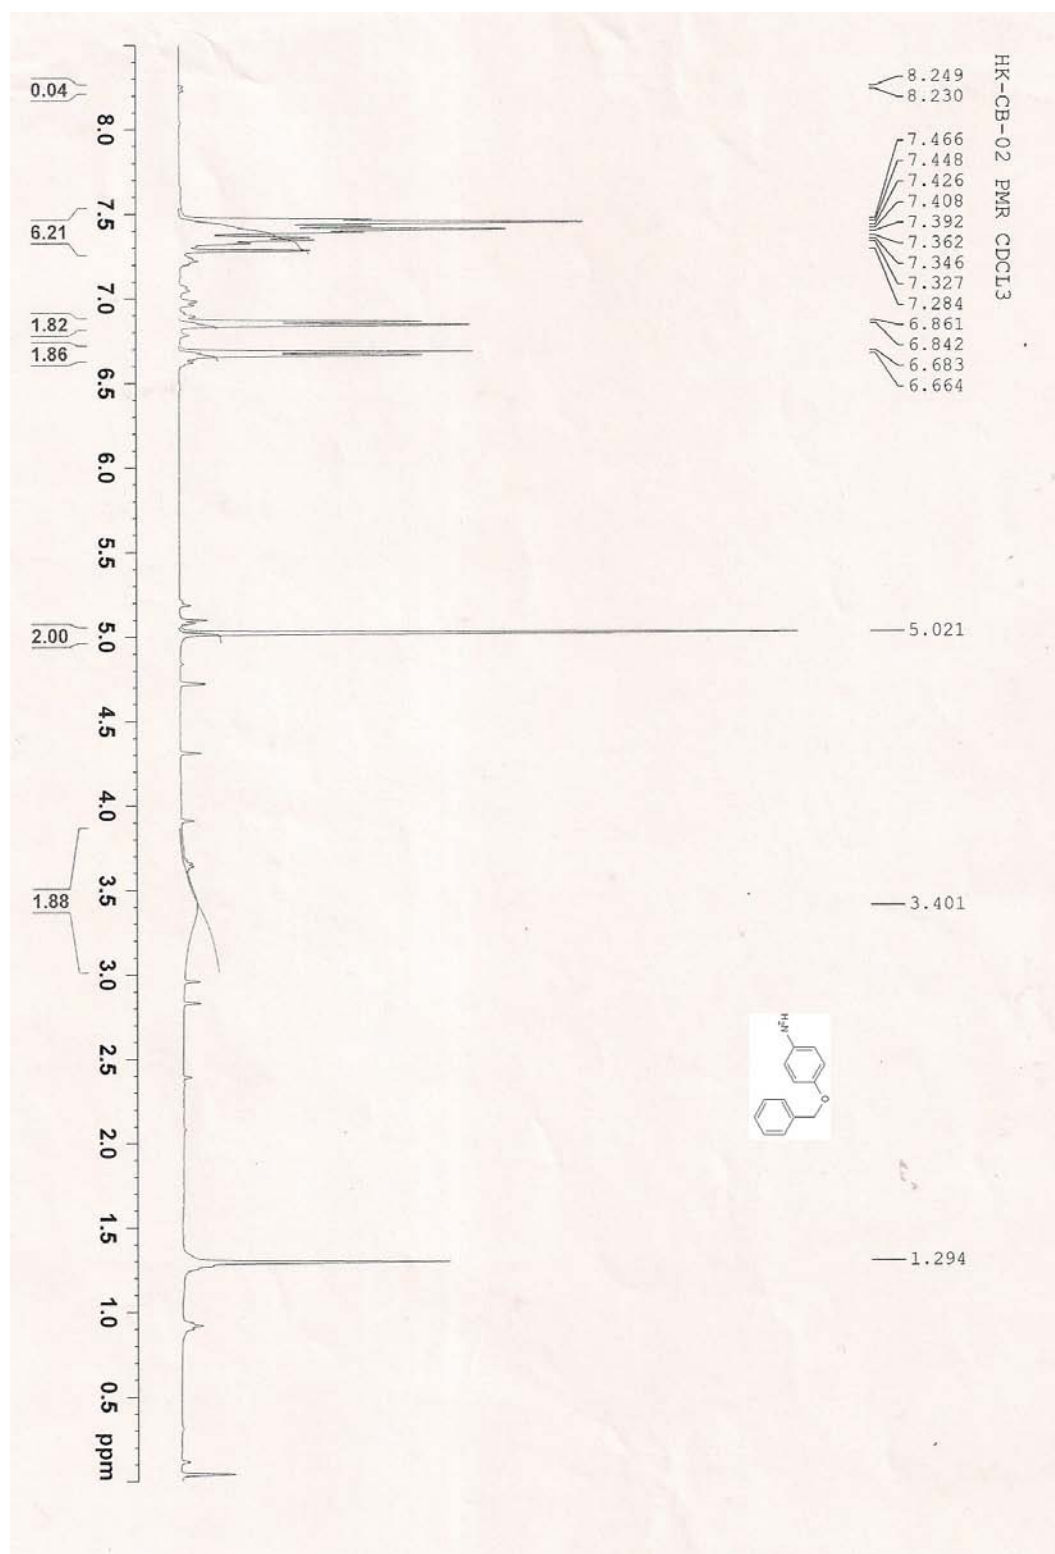

Table 4, Entry 15

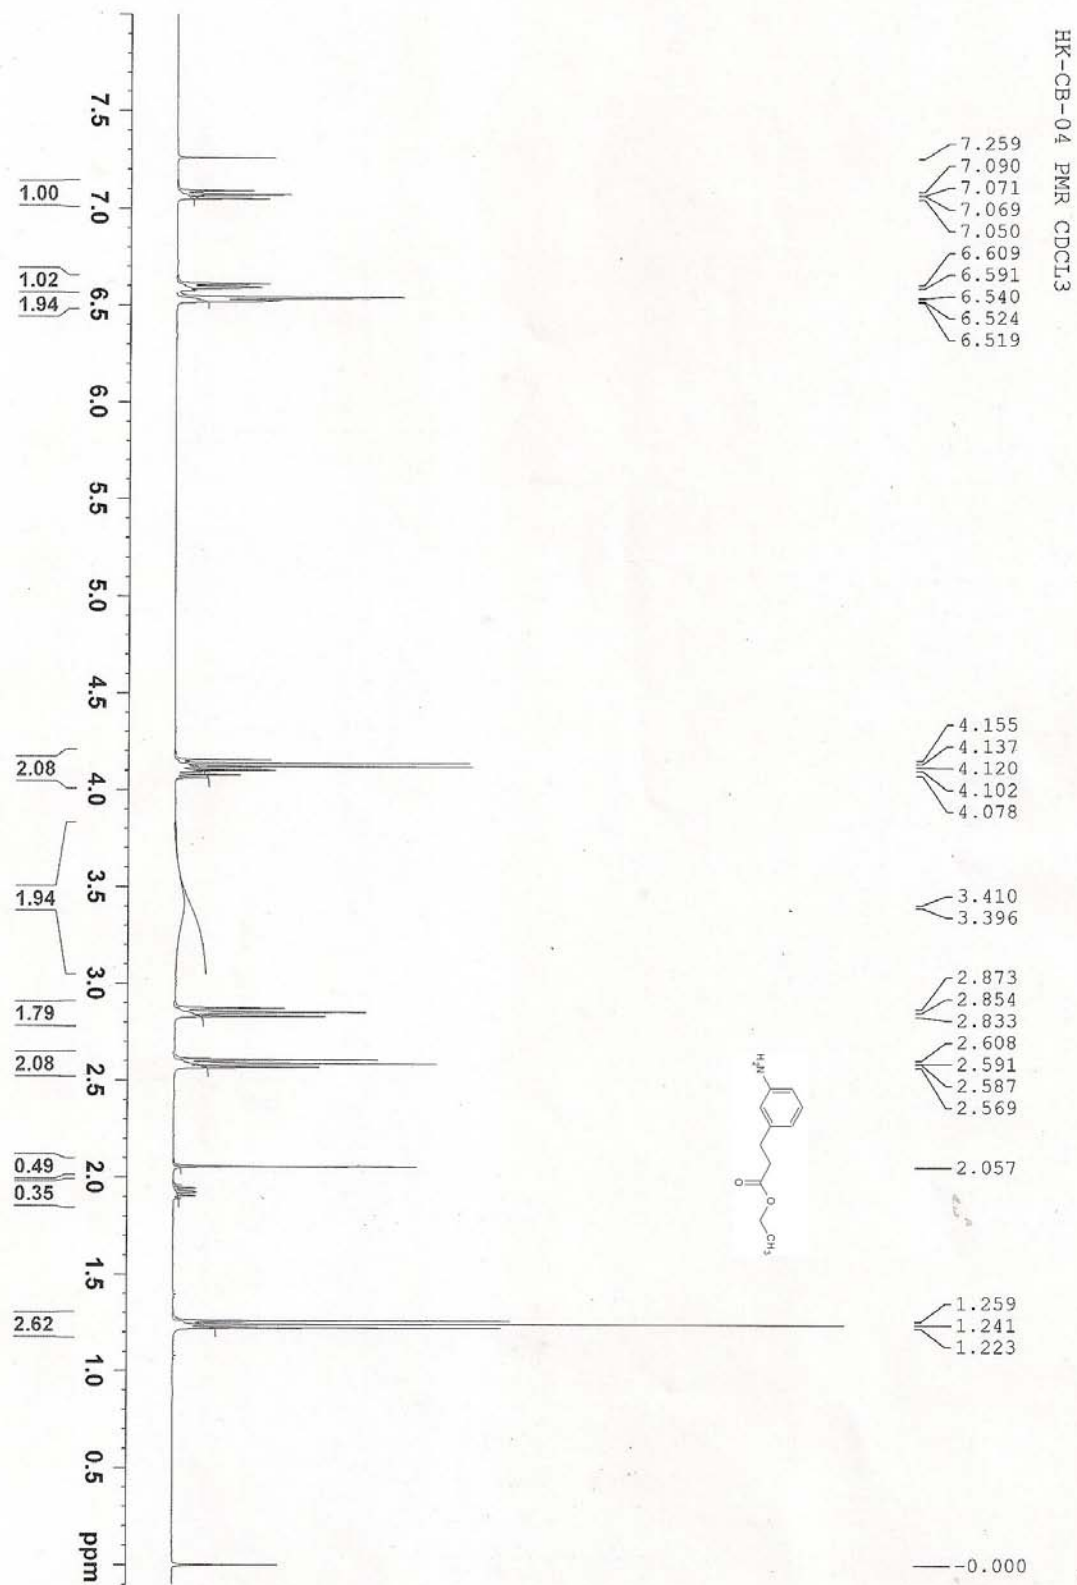



Table 4, Entry 16

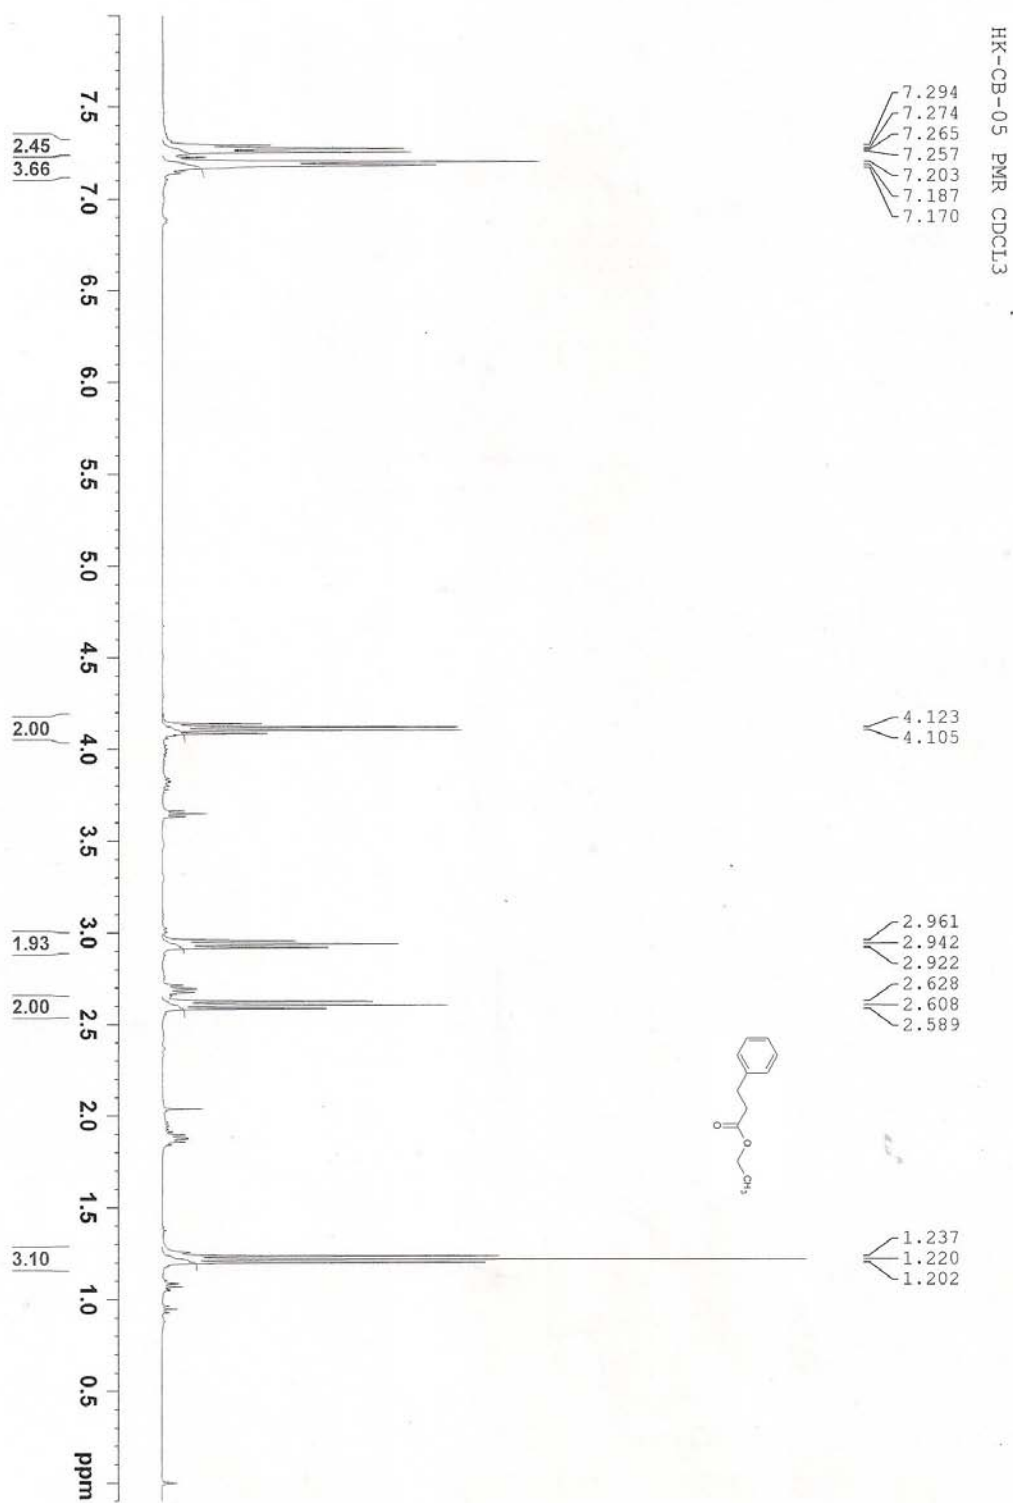

## EDX of recovered Cu catalyst

c:\edax32\genesis\genspc.spc

Label A: NewQuiz 14 Elements

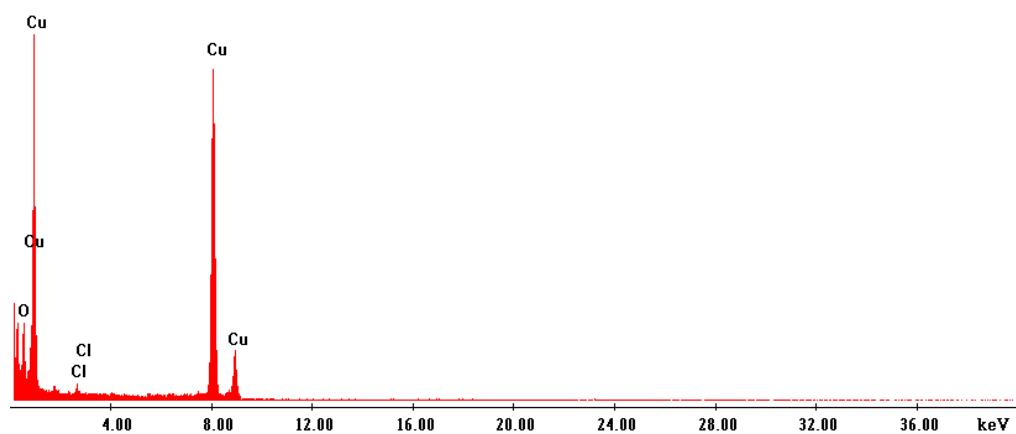

Label A:

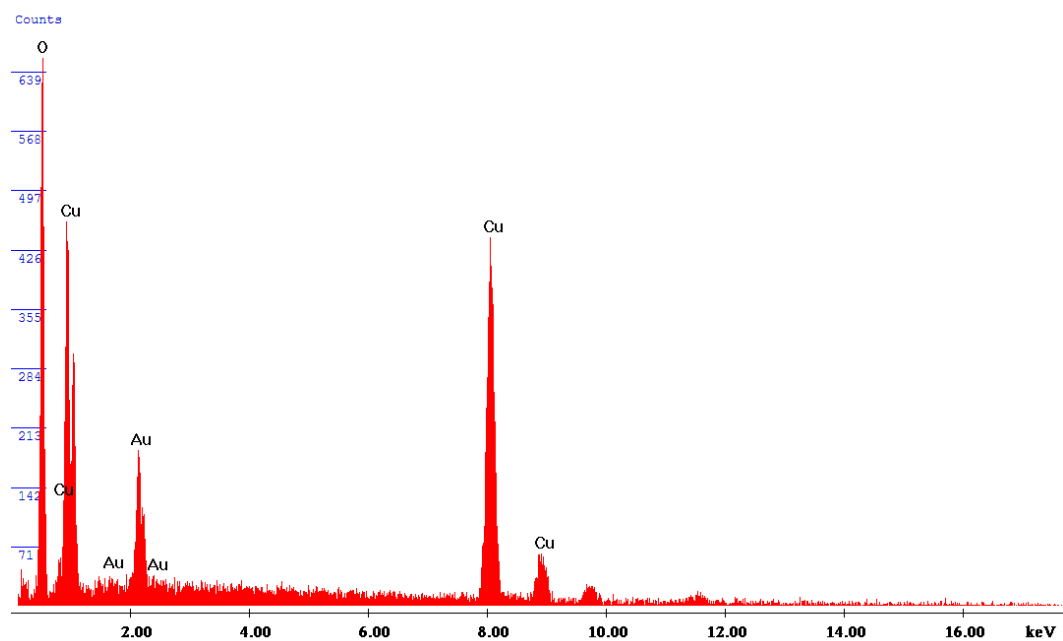

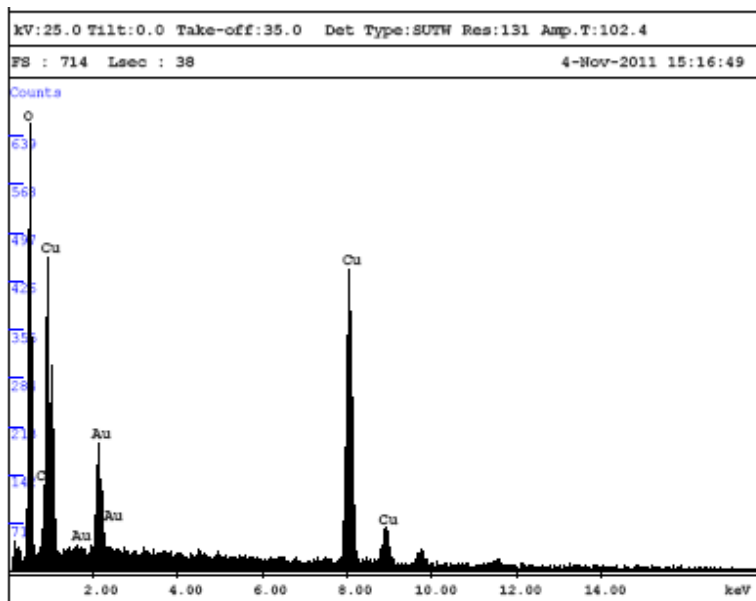

EDAX ZAF Quantification (Standardless)

Element Normalized

SEC Table : Default

| Element | Wt %   | At %   | K-Ratio | Z      | A      | F      |
|---------|--------|--------|---------|--------|--------|--------|
| O K     | 45.48  | 79.82  | 0.1691  | 1.0942 | 0.3396 | 1.0009 |
| AuM     | 13.06  | 1.86   | 0.0963  | 0.8186 | 0.9013 | 1.0000 |
| CuK     | 41.46  | 18.32  | 0.3893  | 0.9201 | 0.9993 | 1.0212 |
| Total   | 100.00 | 100.00 |         |        |        |        |

| Element | Net Inte. | Bkqd Inte. | Inte. Error | F/B   |
|---------|-----------|------------|-------------|-------|
| O K     | 86.02     | 1.75       | 1.78        | 49.27 |
| AuM     | 32.73     | 5.47       | 3.26        | 5.98  |
| CuK     | 135.76    | 2.50       | 1.41        | 54.27 |

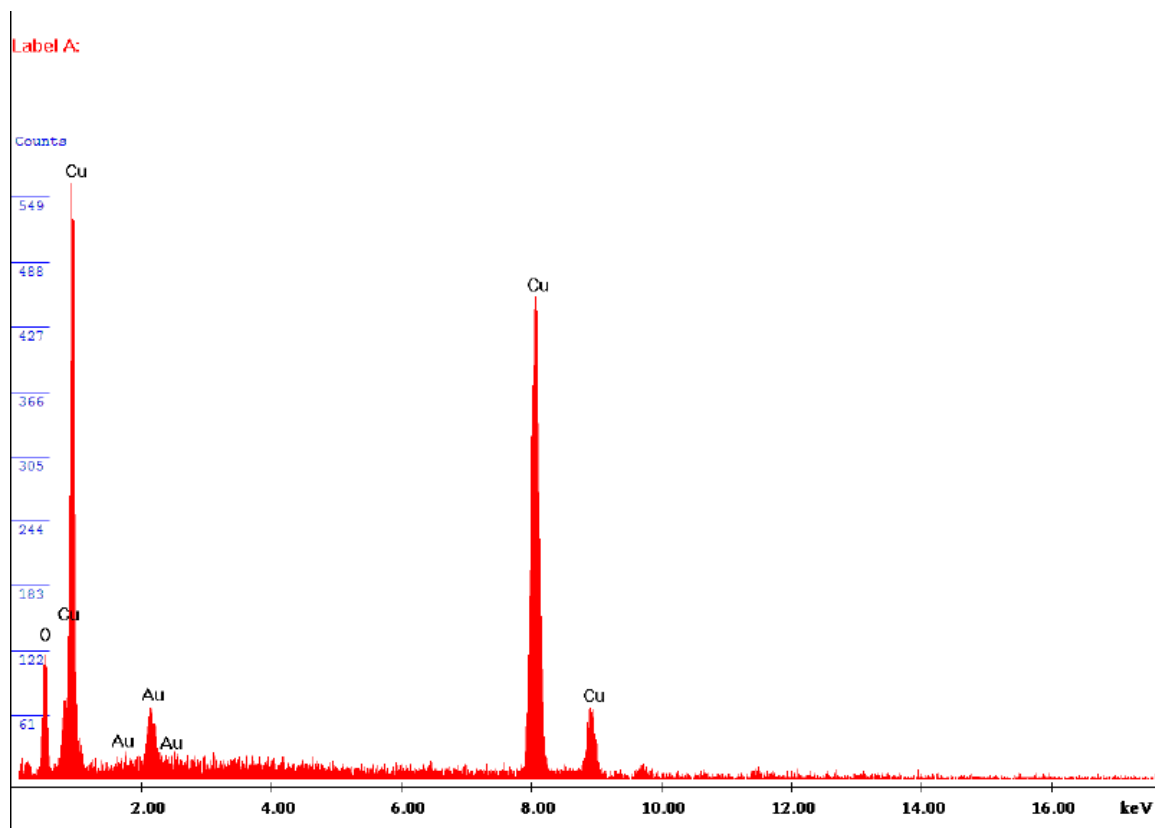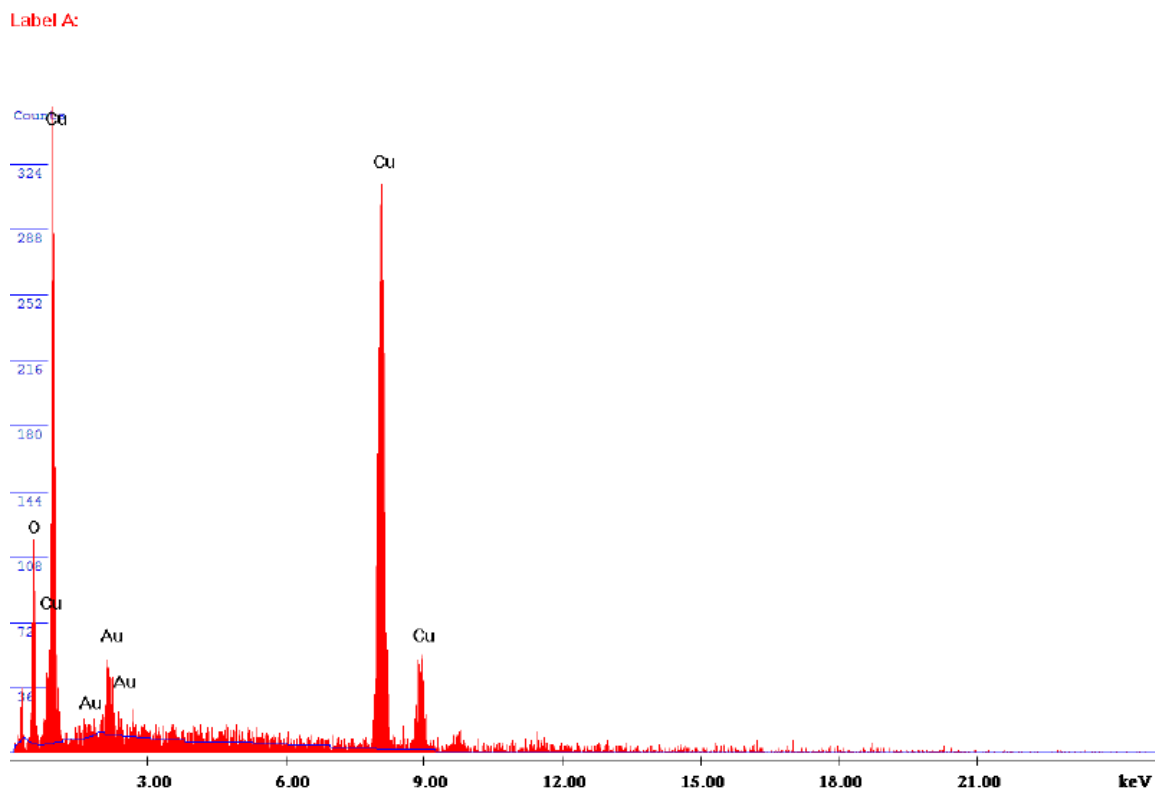

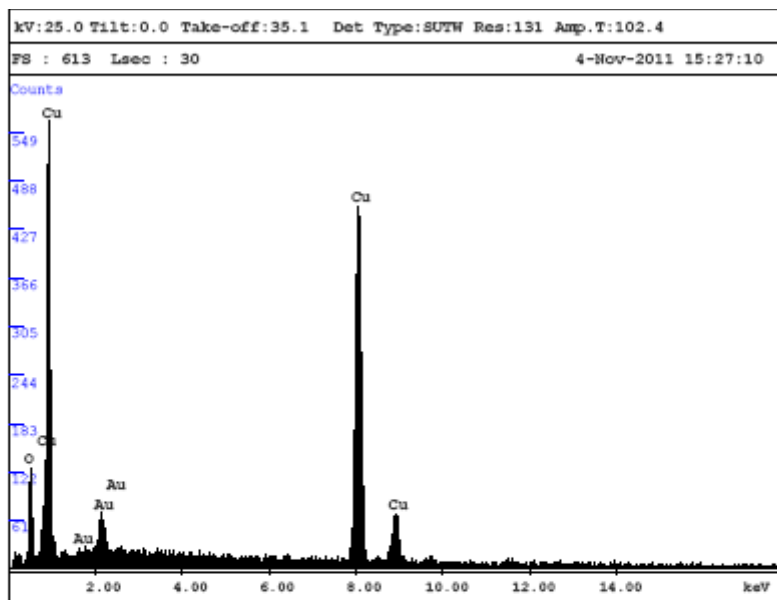

EDAX ZAF Quantification (Standardless)

Element Normalized

SEC Table : Default

| Element | Wt %   | At %   | K-Ratio | Z      | A      | F      |
|---------|--------|--------|---------|--------|--------|--------|
| O K     | 17.54  | 47.67  | 0.0566  | 1.1501 | 0.2801 | 1.0020 |
| AuM     | 8.89   | 1.96   | 0.0558  | 0.8595 | 0.7300 | 1.0000 |
| CuK     | 73.58  | 50.36  | 0.7194  | 0.9716 | 0.9960 | 1.0103 |
| Total   | 100.00 | 100.00 |         |        |        |        |

| Element | Net Inte. | Bkgd Inte. | Inte. Error | P/B   |
|---------|-----------|------------|-------------|-------|
| O K     | 20.42     | 1.63       | 4.30        | 12.56 |
| AuM     | 13.43     | 5.23       | 6.56        | 2.57  |
| CuK     | 177.59    | 2.08       | 1.37        | 85.34 |

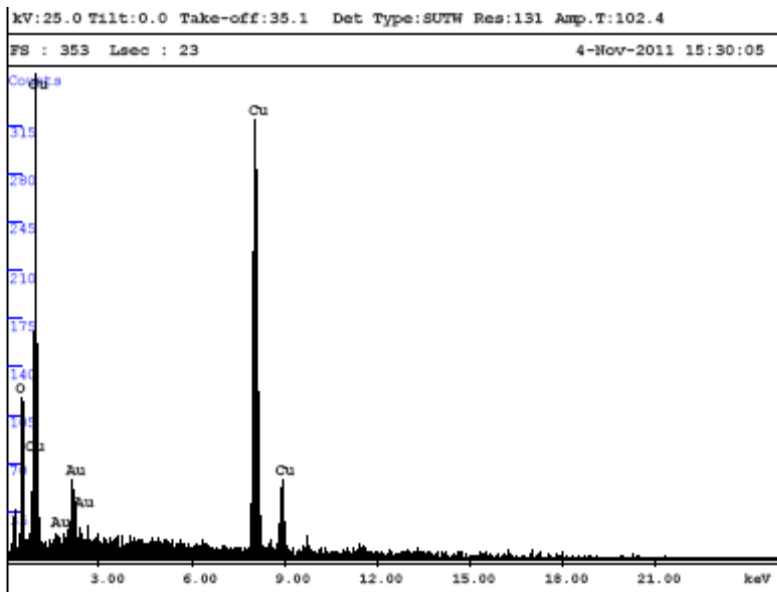

EDAX ZAF Quantification (Standardless)

Element Normalized  
 SEC Table : Default

| Element | Wt %   | At %   | K-Ratio | Z      | A      | F      |
|---------|--------|--------|---------|--------|--------|--------|
| O K     | 20.14  | 52.12  | 0.0657  | 1.1446 | 0.2844 | 1.0019 |
| AuM     | 9.45   | 1.99   | 0.0602  | 0.8555 | 0.7446 | 1.0000 |
| CuK     | 70.41  | 45.89  | 0.6857  | 0.9666 | 0.9962 | 1.0112 |
| Total   | 100.00 | 100.00 |         |        |        |        |

| Element | Net Inte. | Bkgd Inte. | Inte. Error | F/B    |
|---------|-----------|------------|-------------|--------|
| O K     | 24.32     | 1.28       | 4.41        | 18.97  |
| AuM     | 14.87     | 4.27       | 6.73        | 3.48   |
| CuK     | 173.66    | 1.37       | 1.58        | 126.97 |

### SEM of recovered Cu catalyst

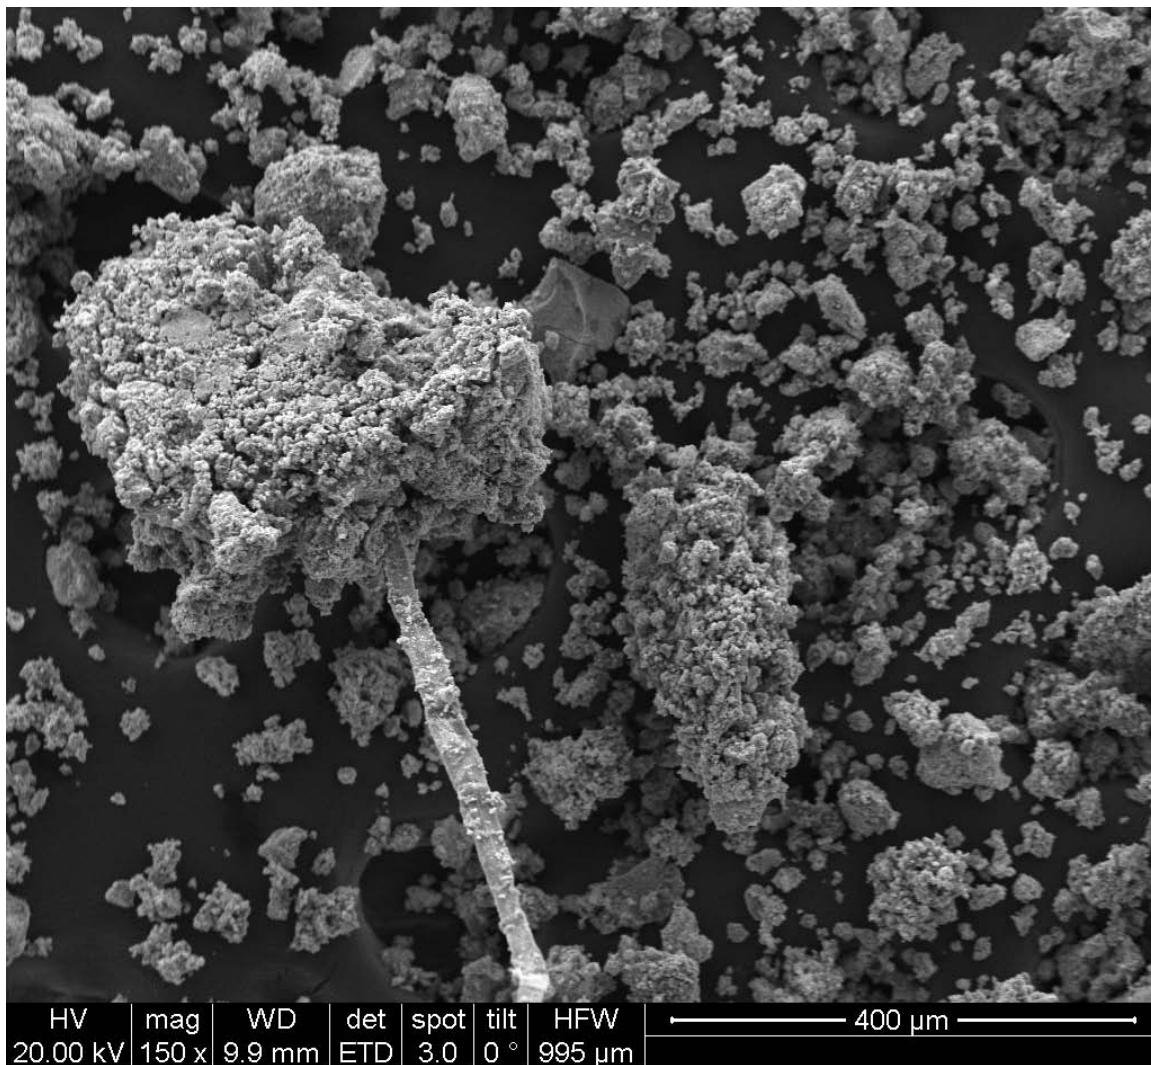



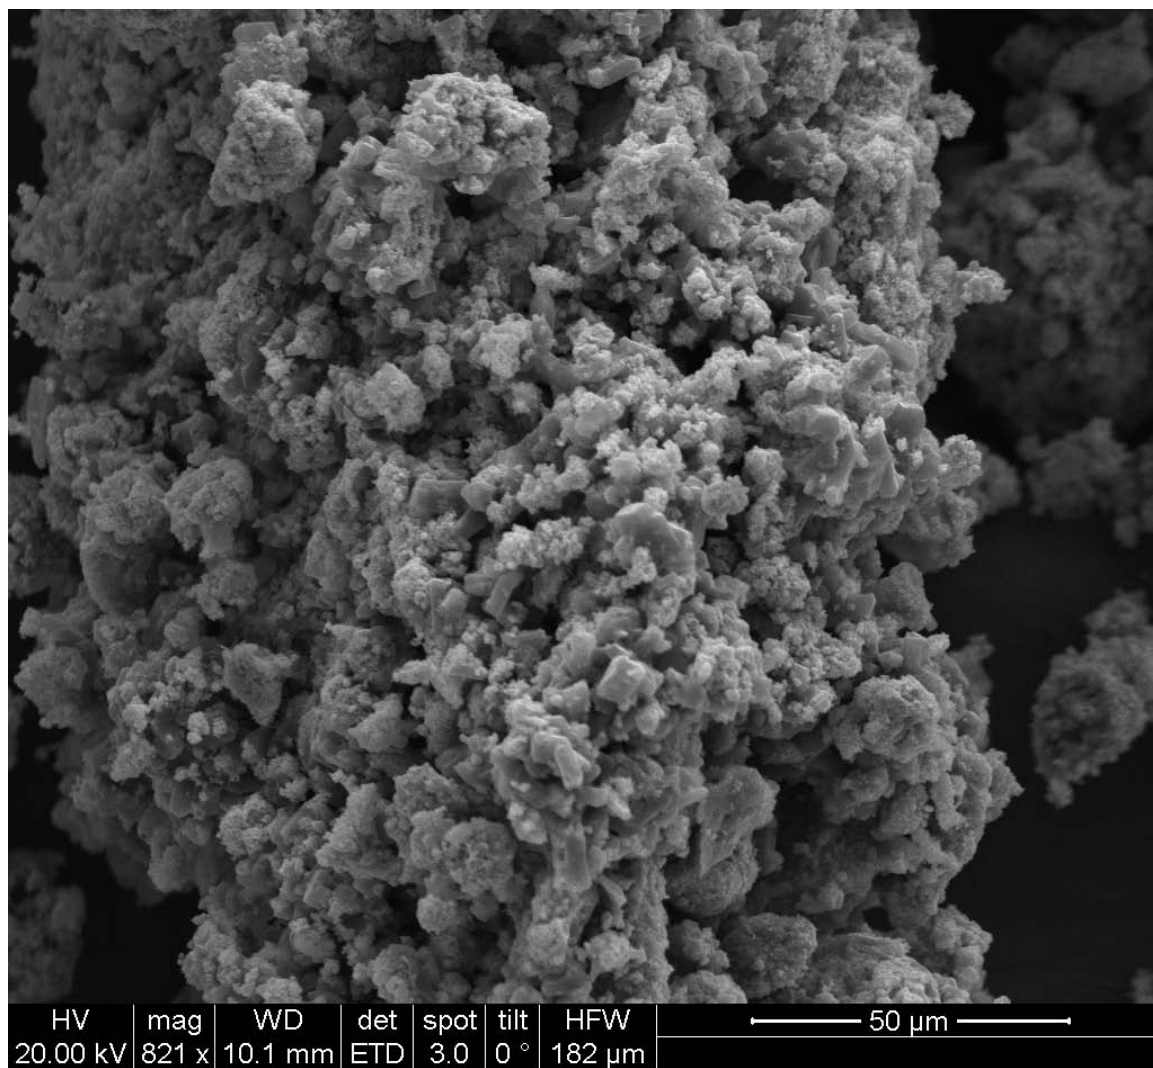

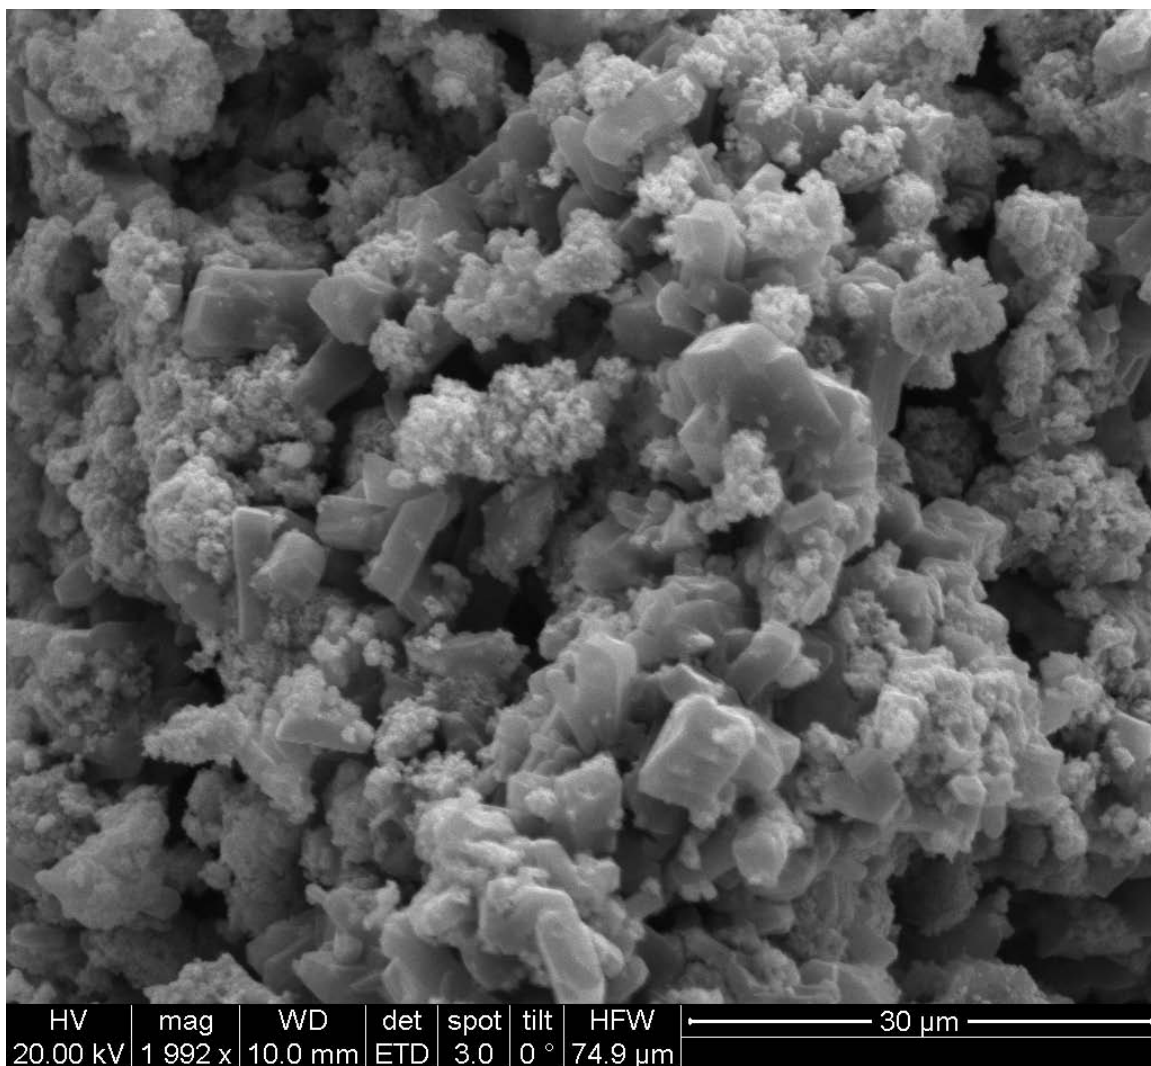

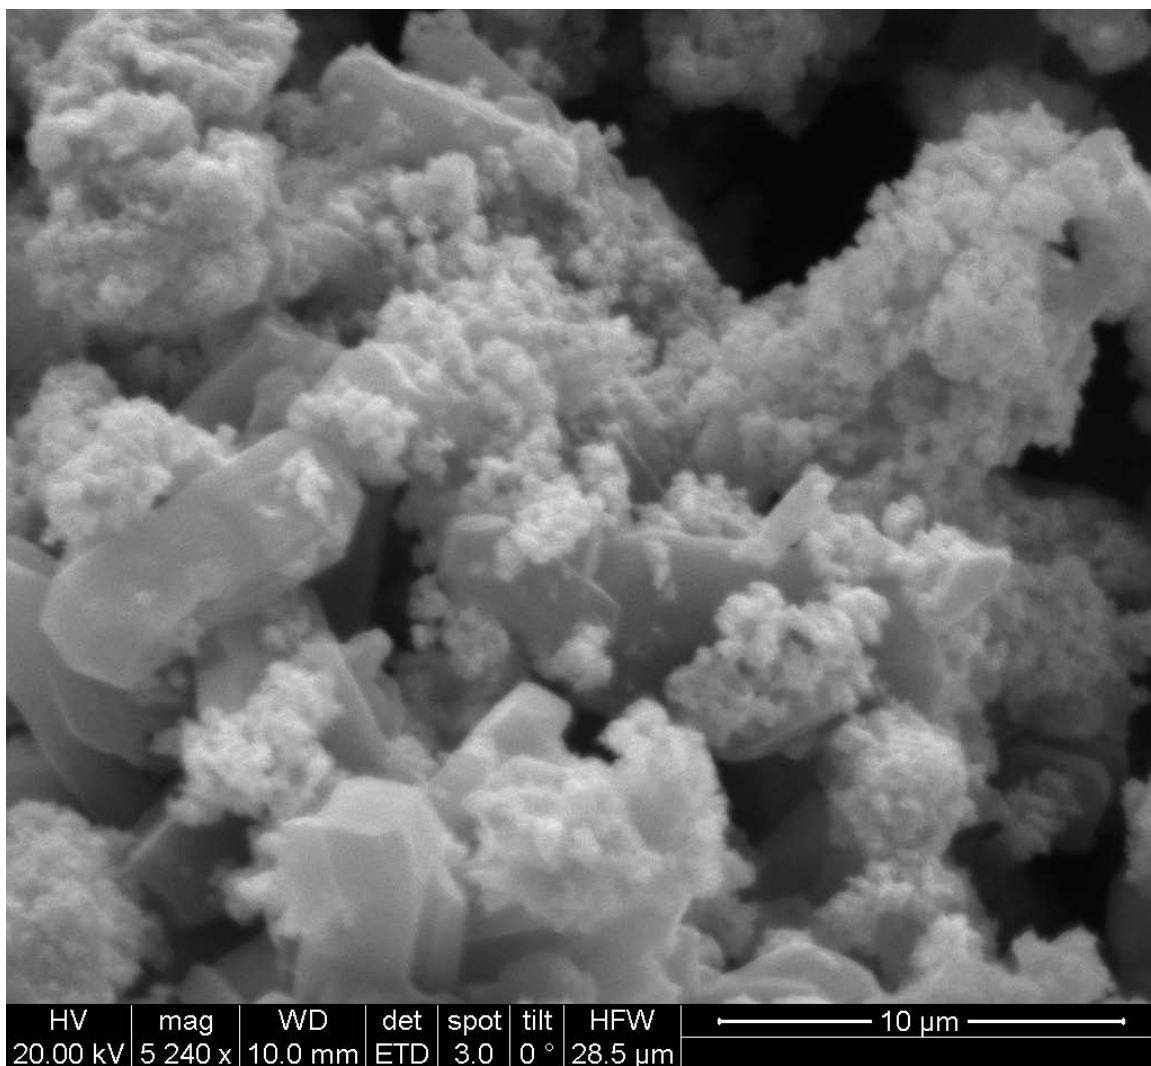

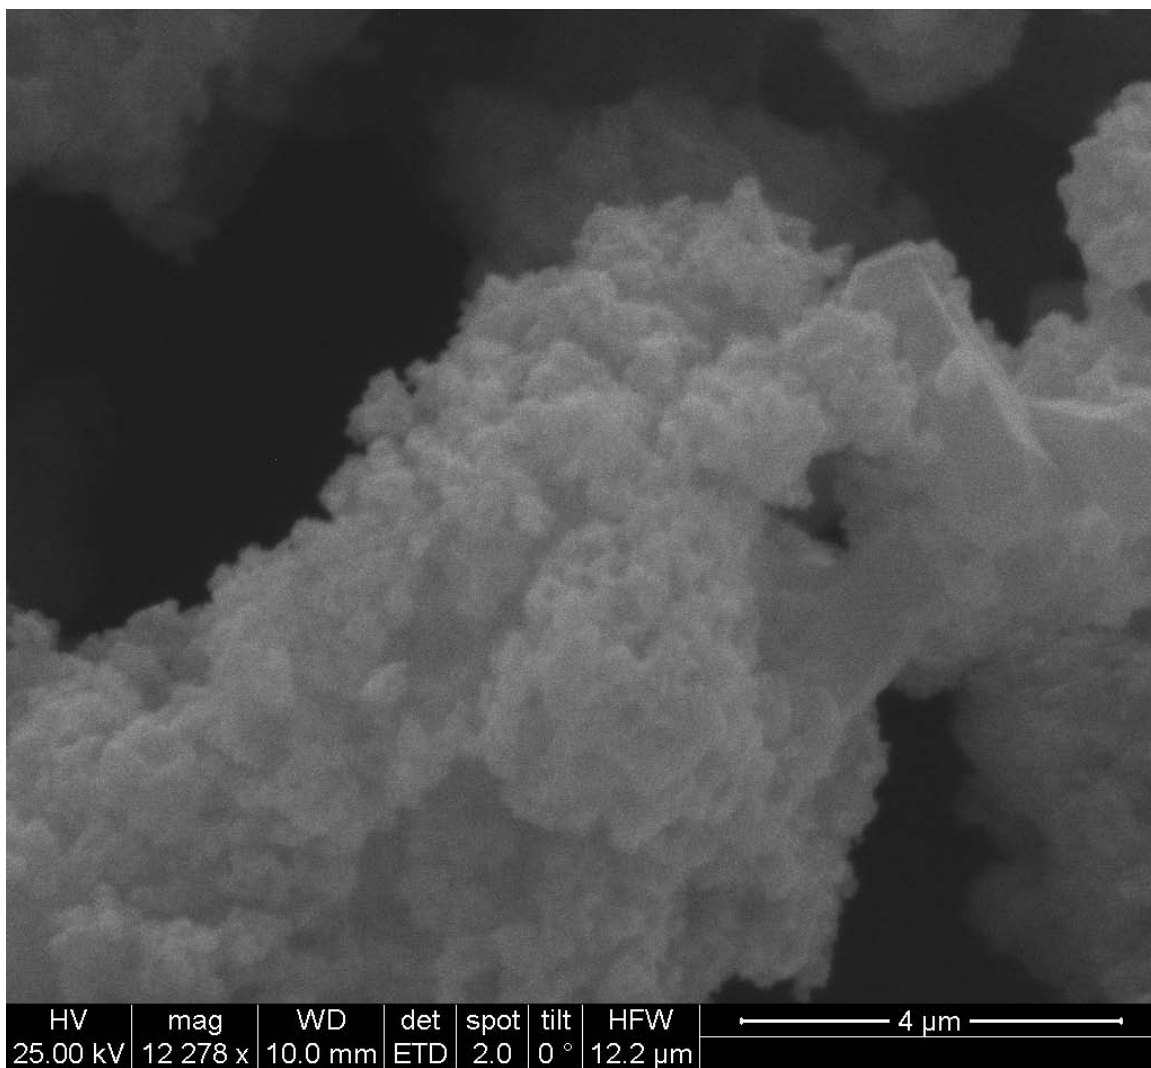

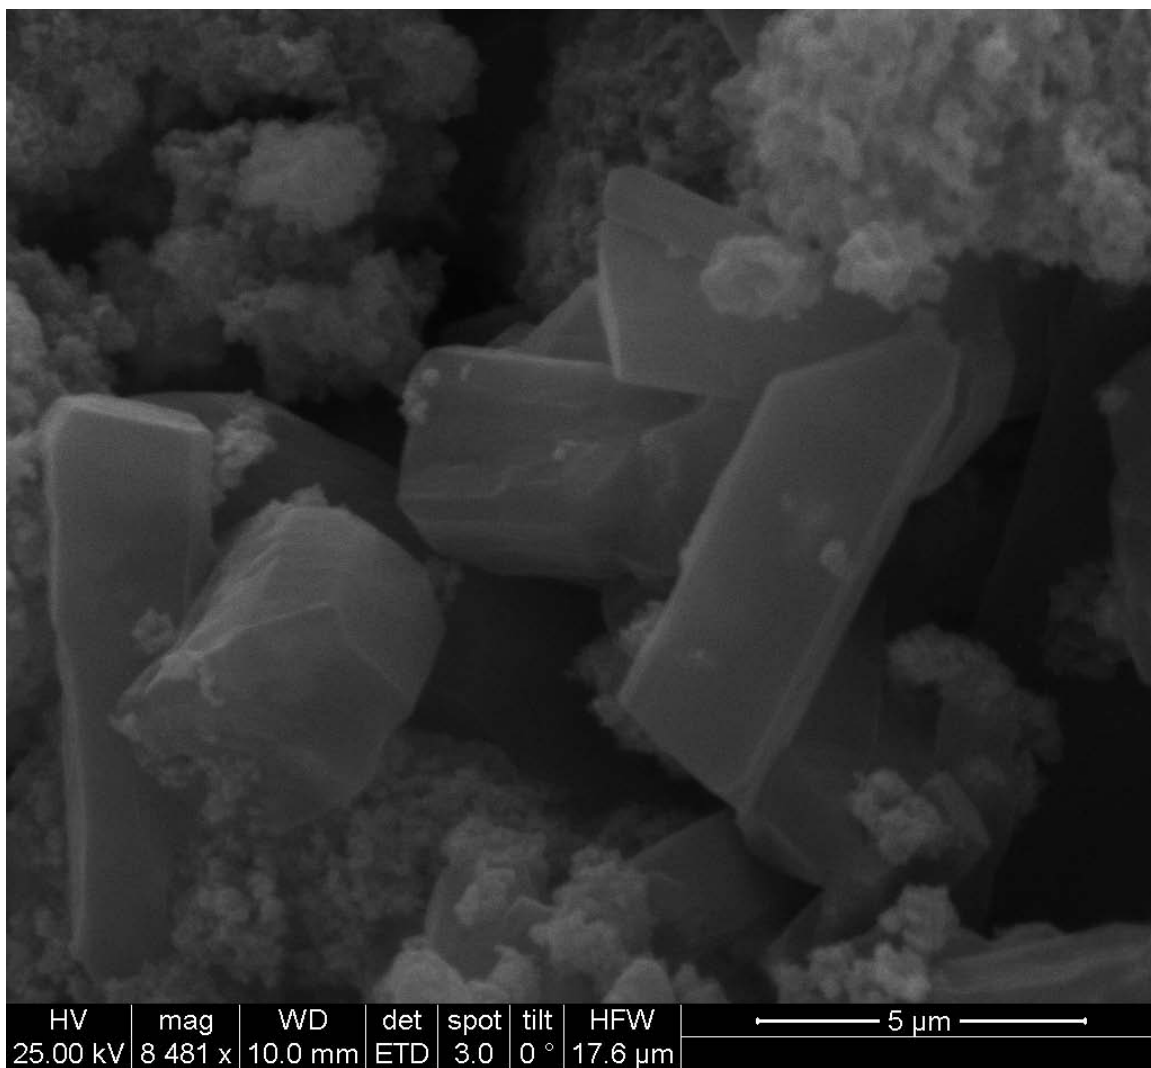



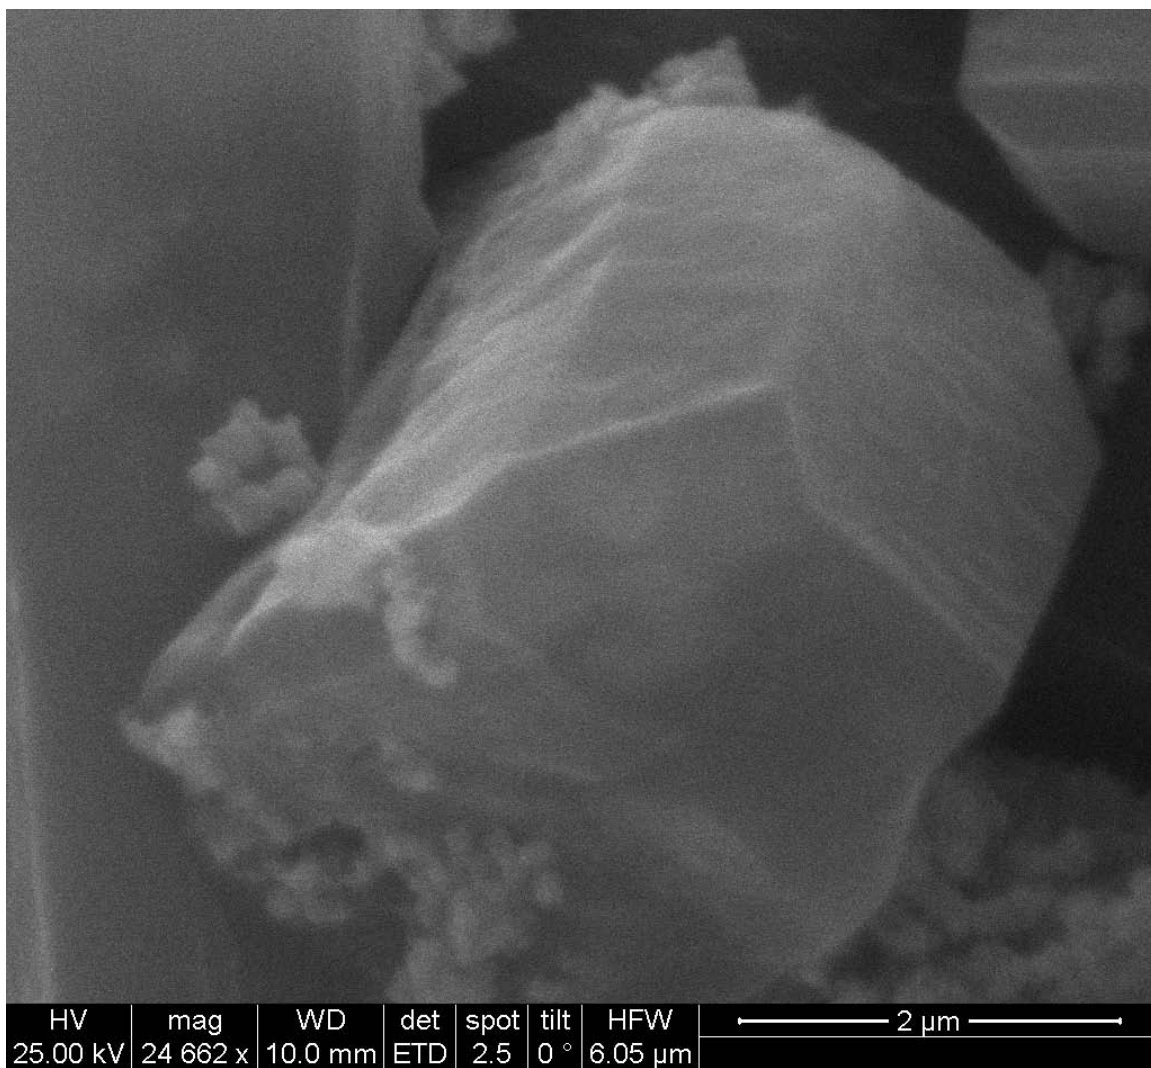

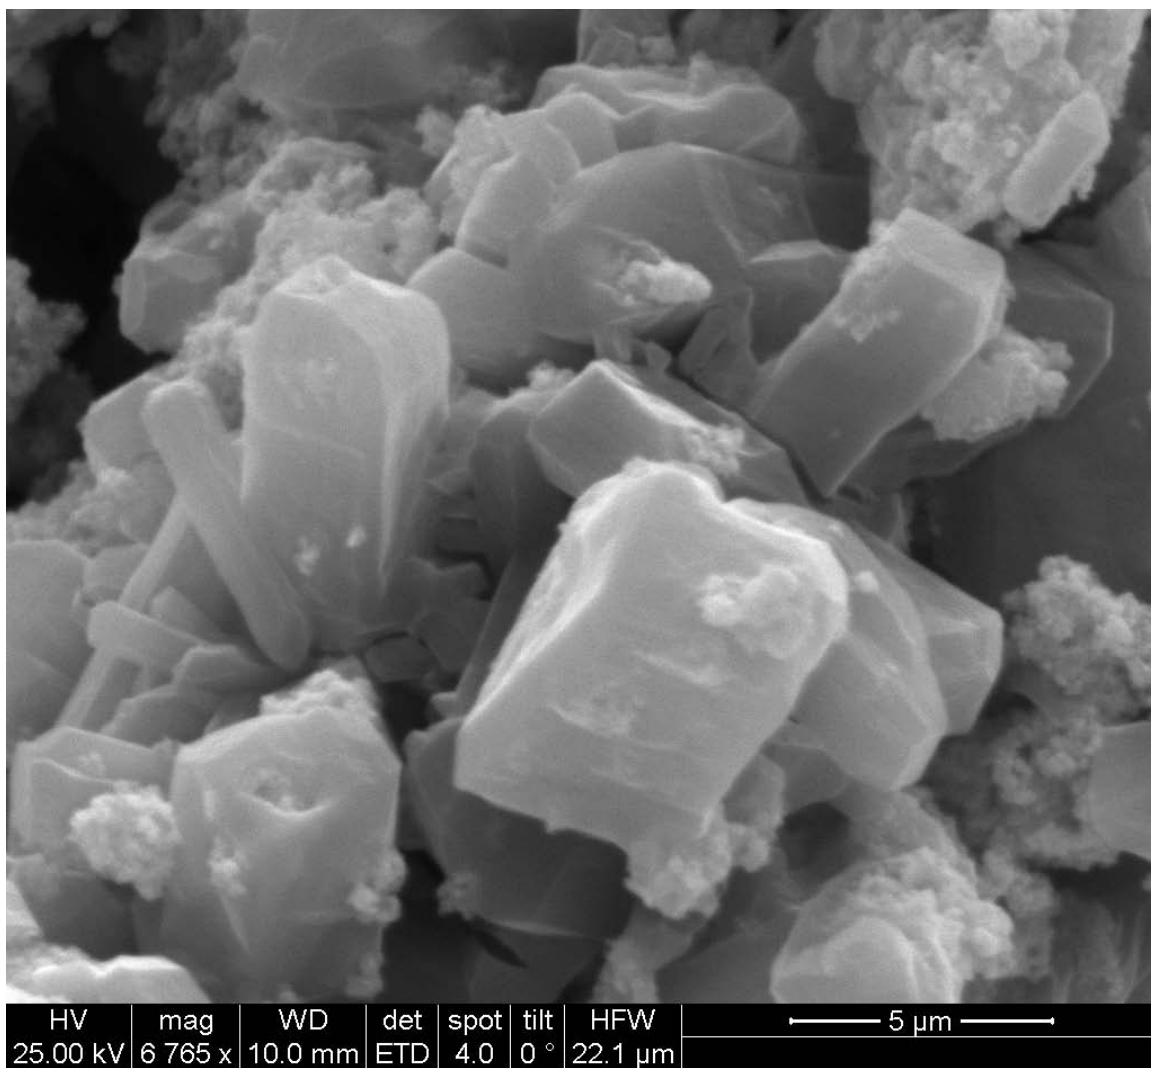



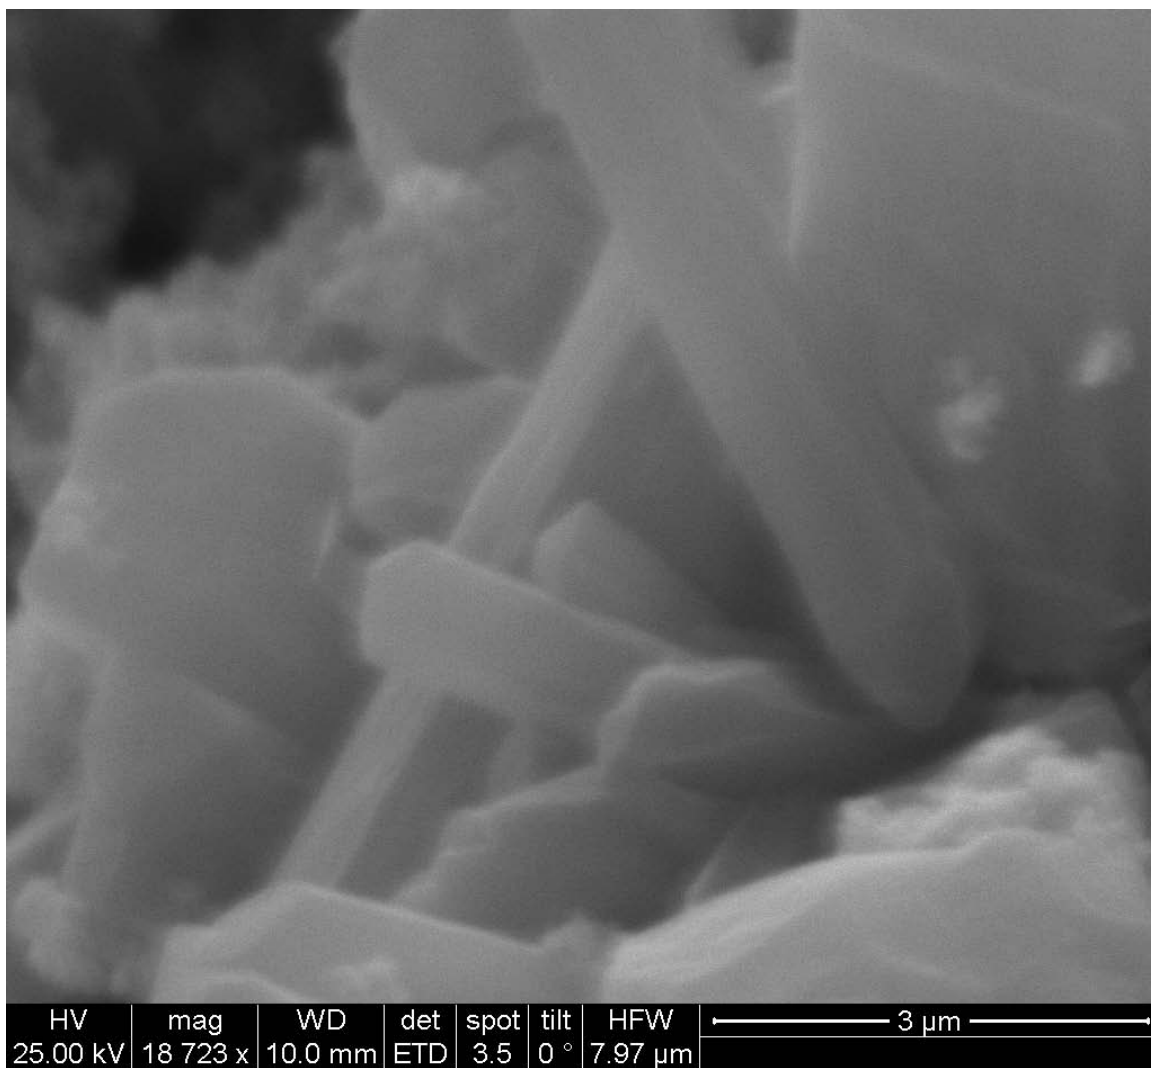

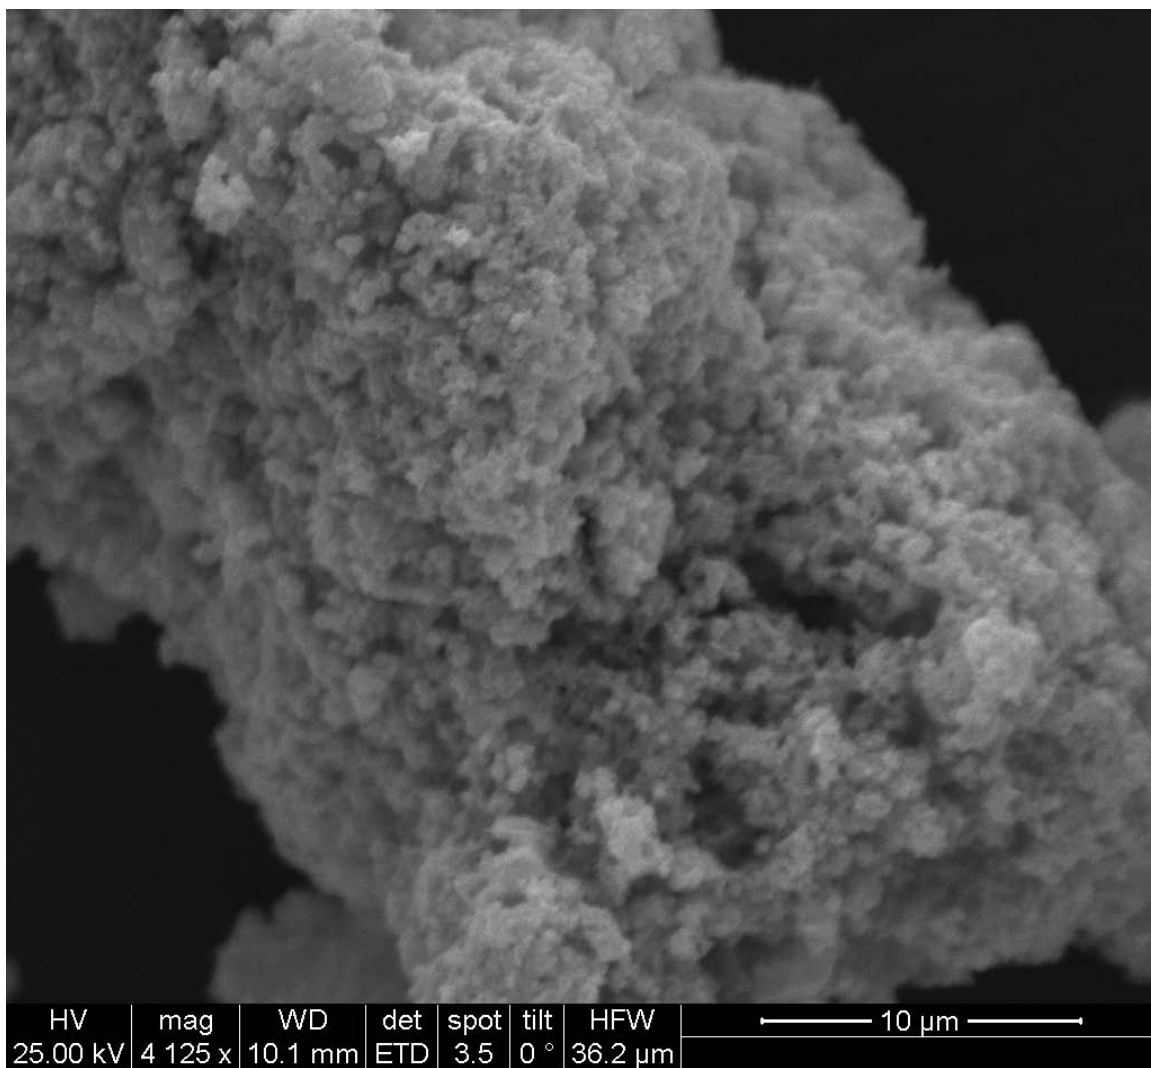

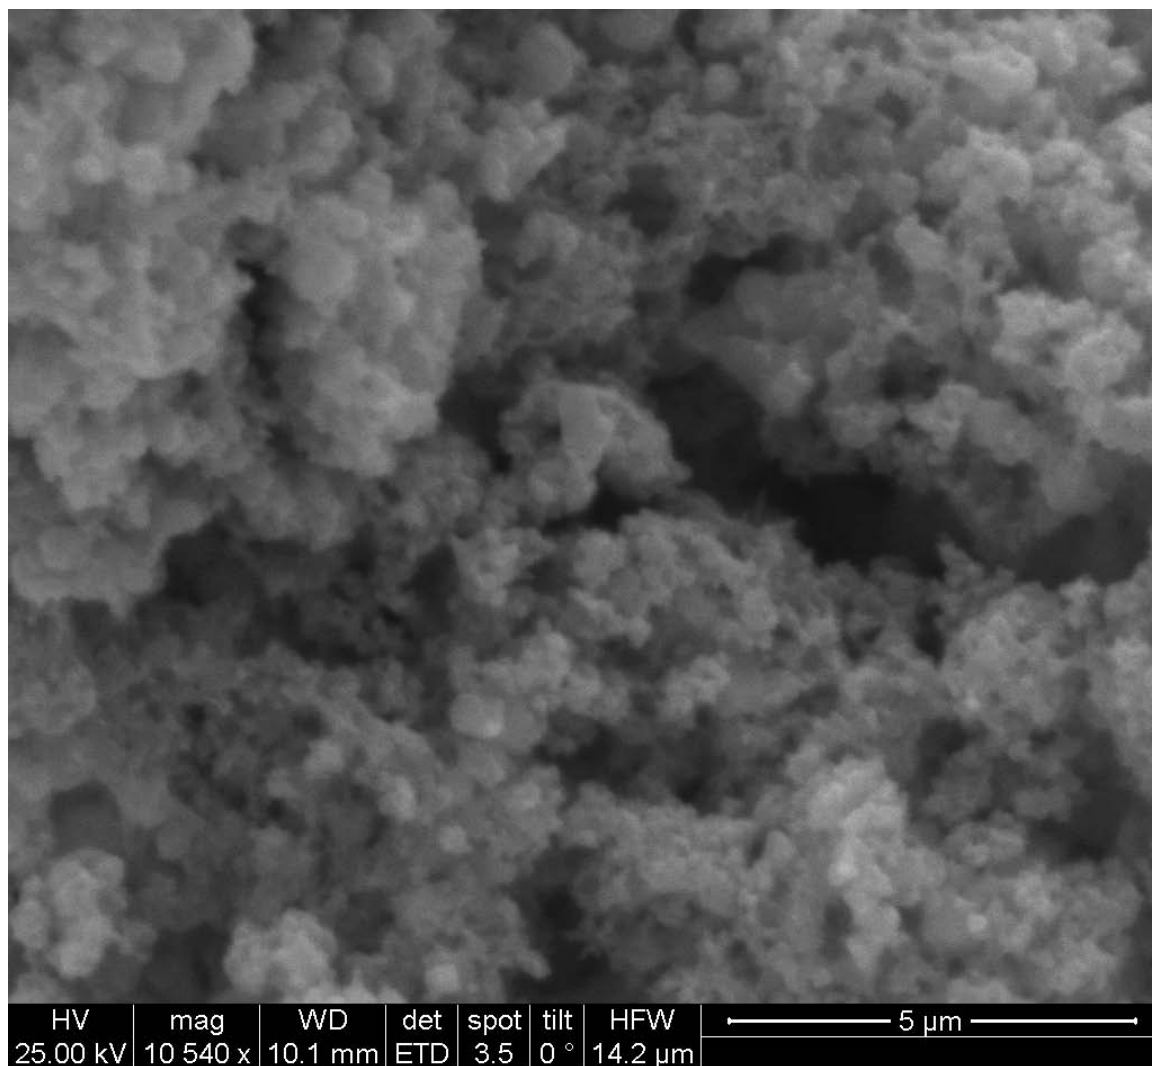

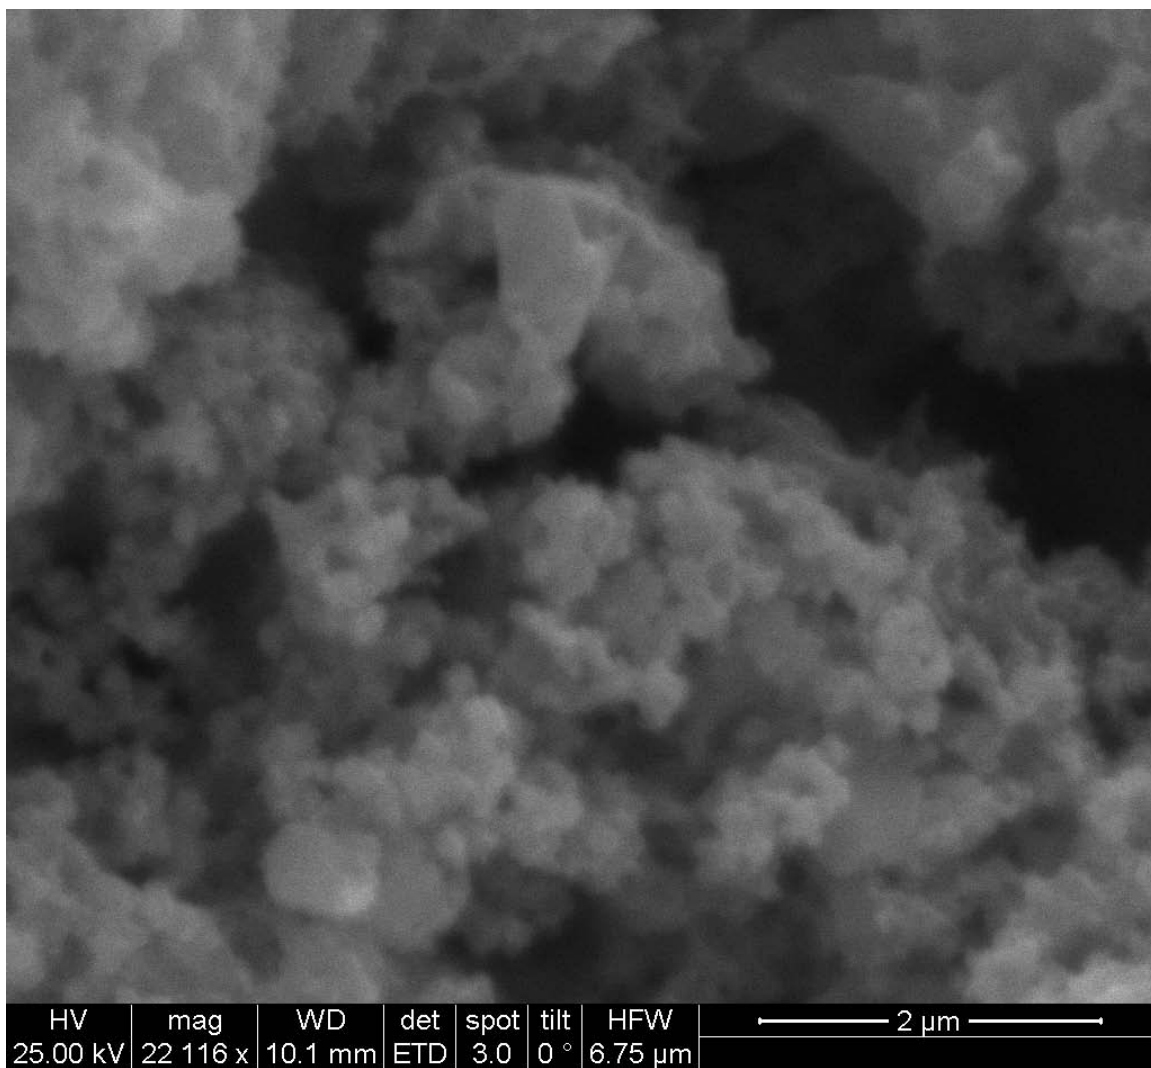

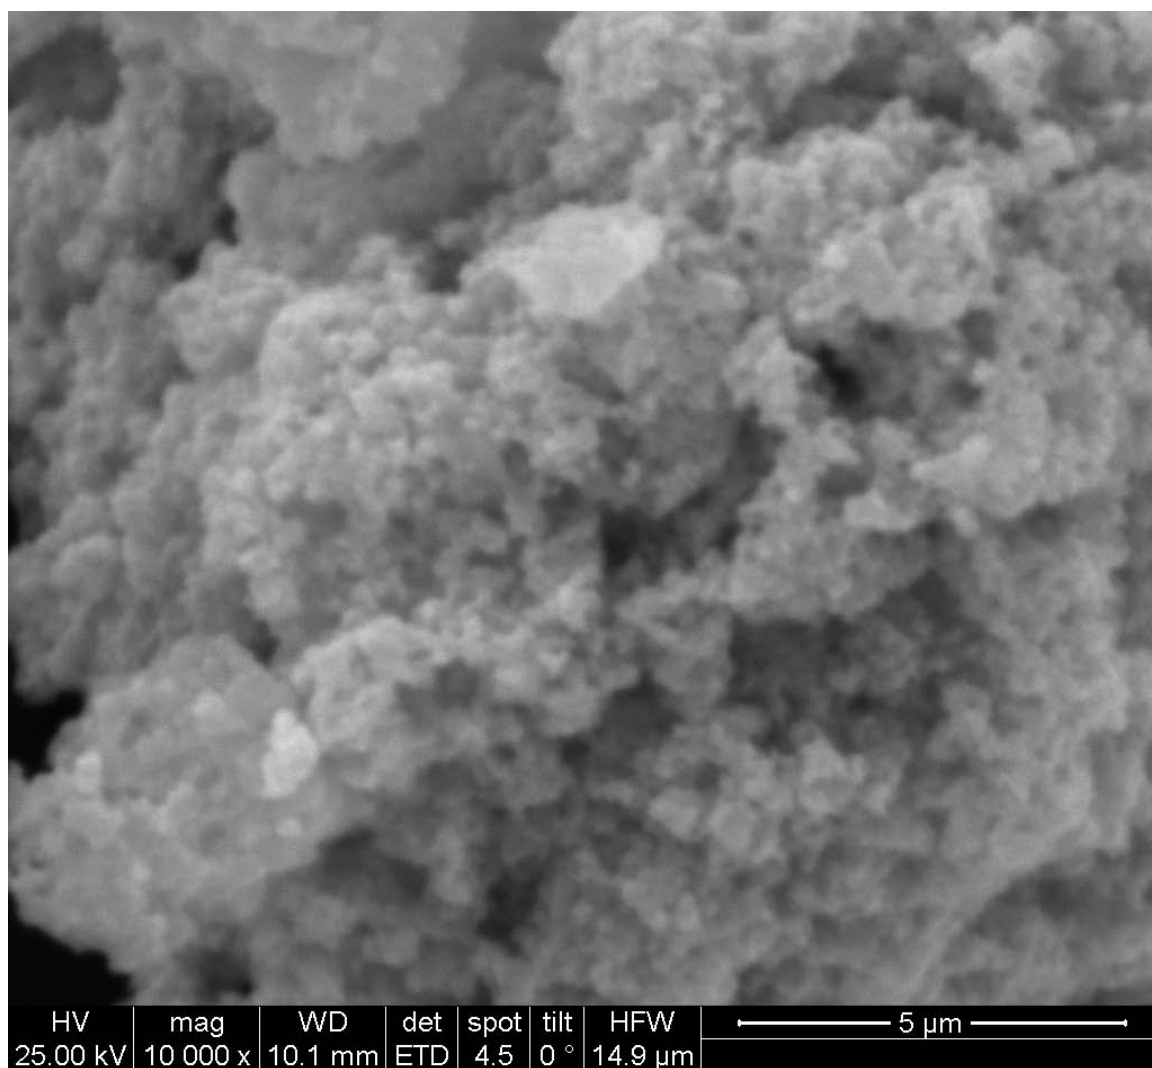

**XRD of Recovered Cu Catalyst after nitroreduction and without nitroreduction**

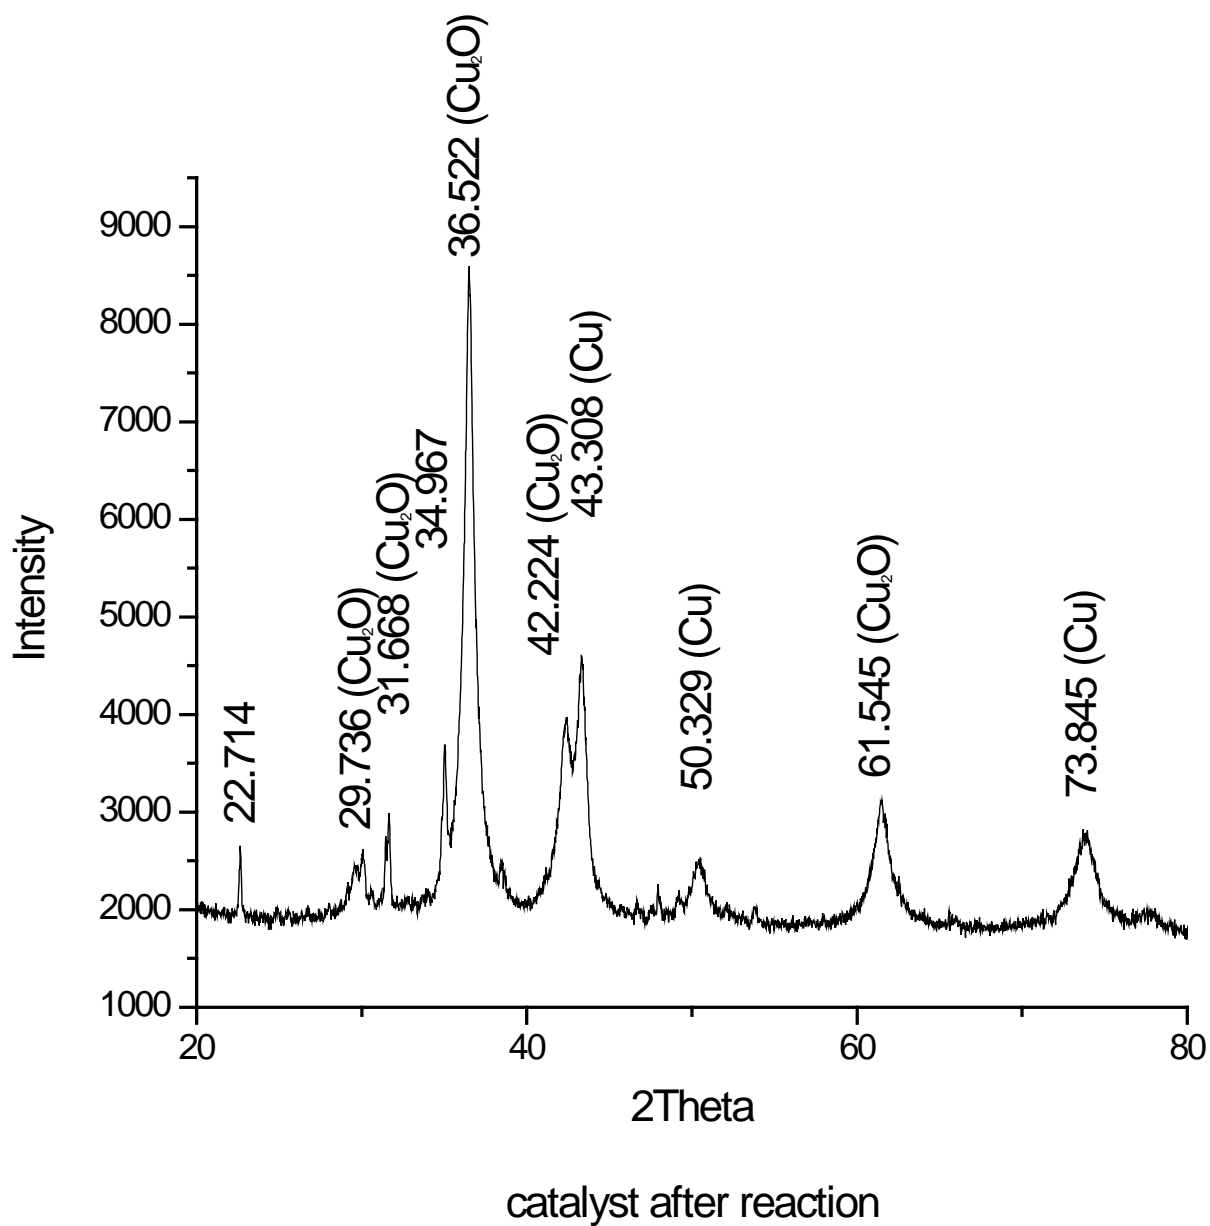

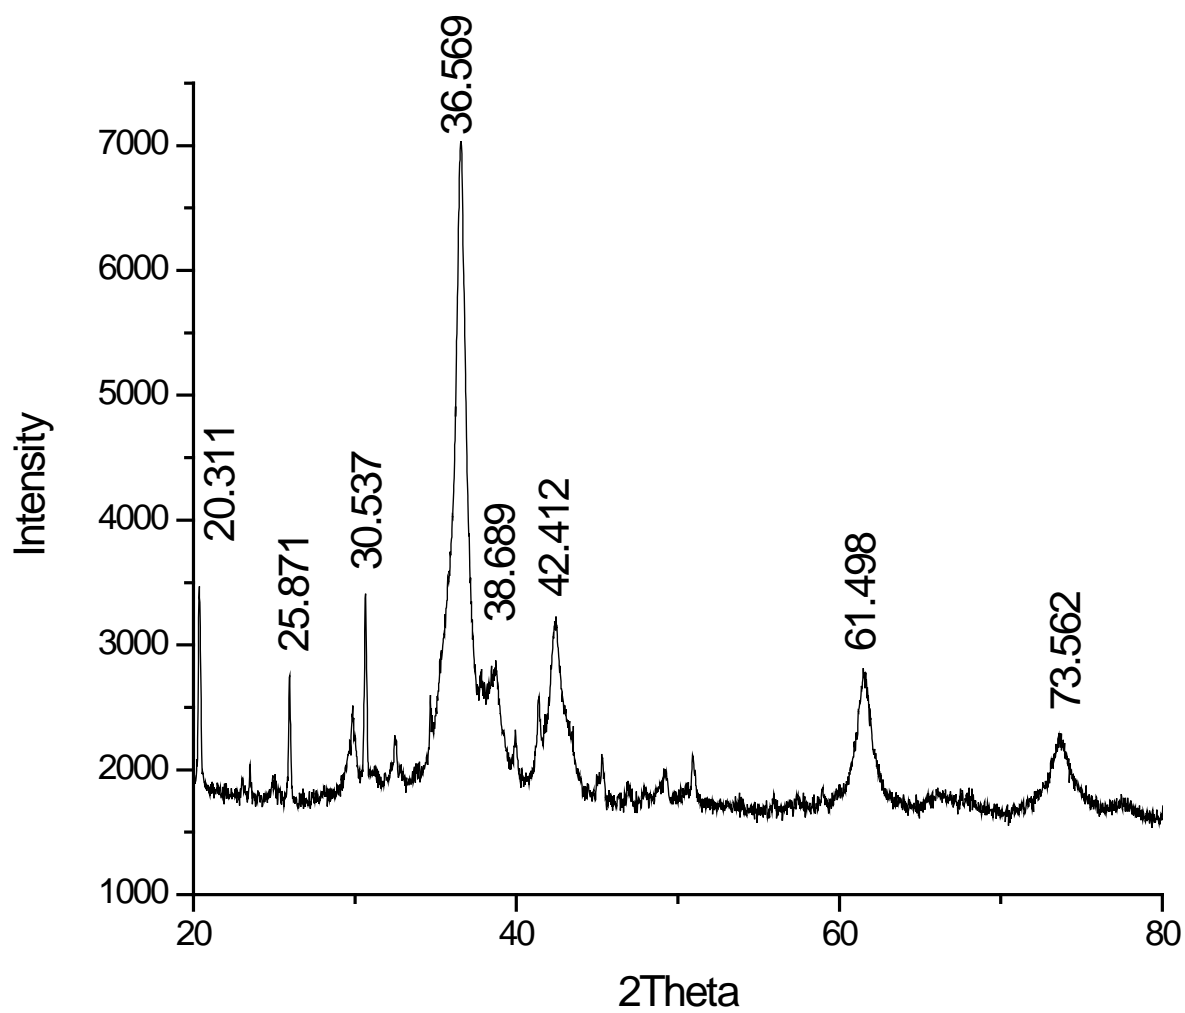

catalyst without reaction



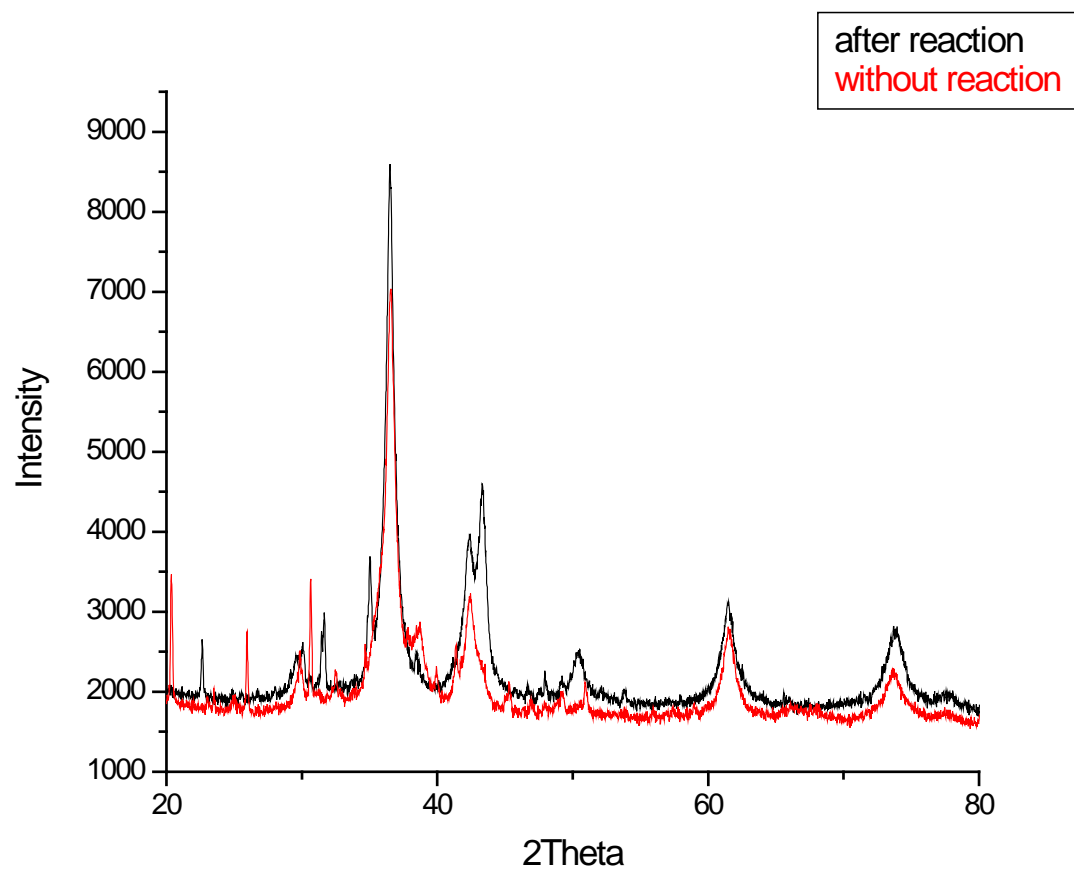

**TEM of recovered Cu catalyst after nitroreduction**

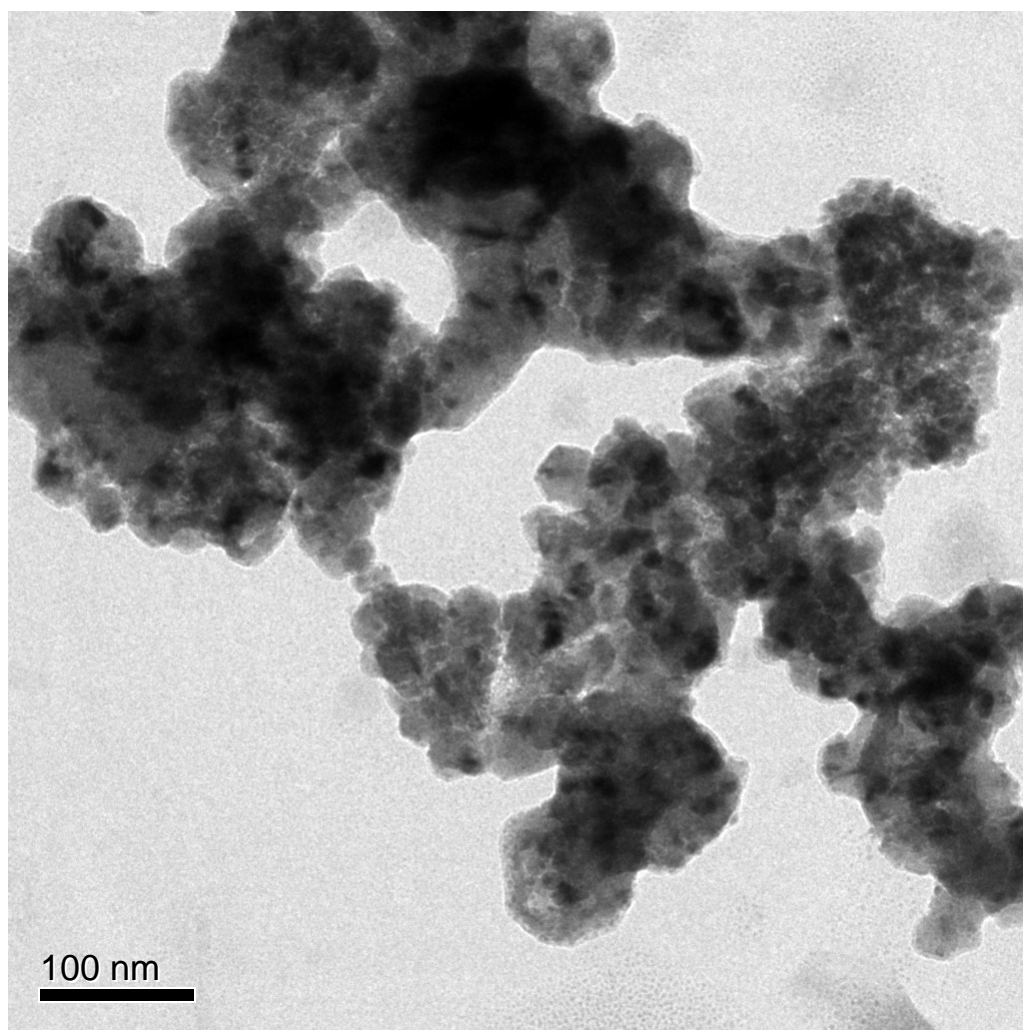

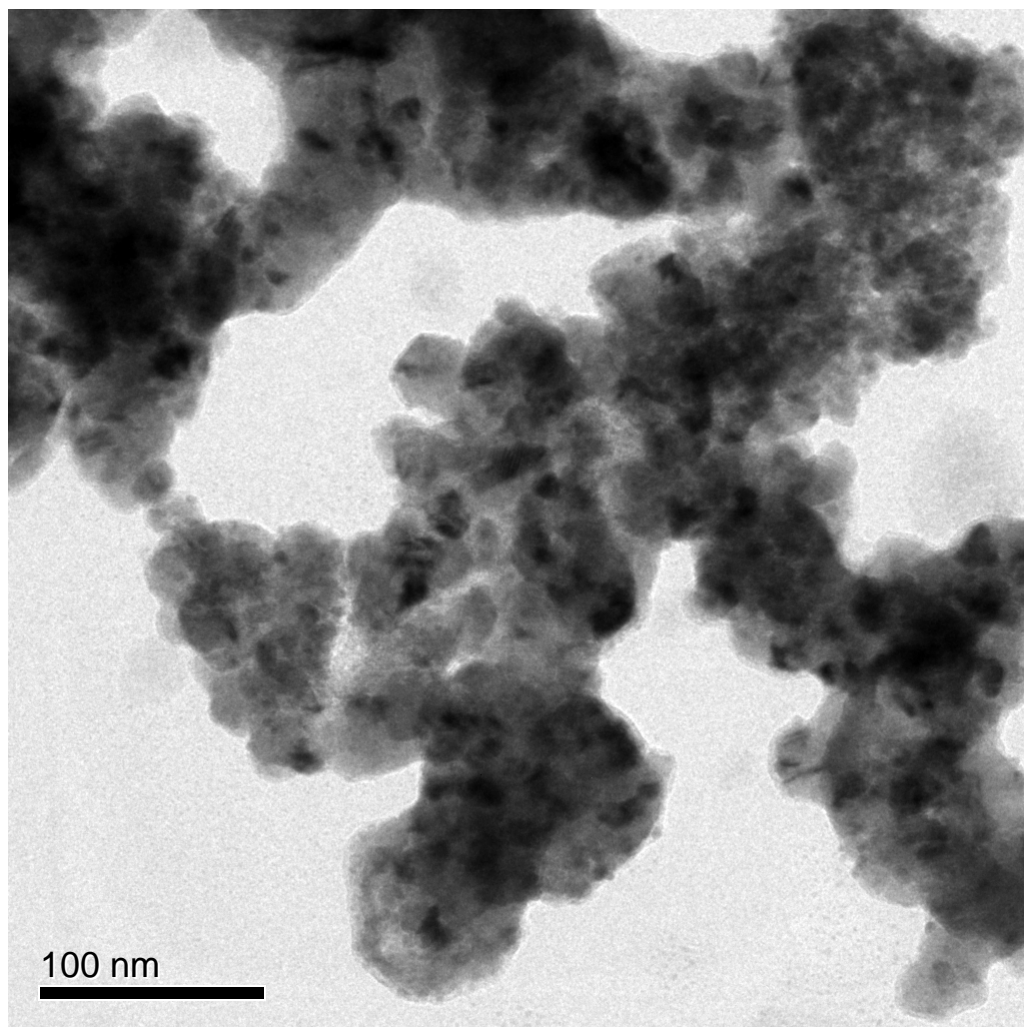

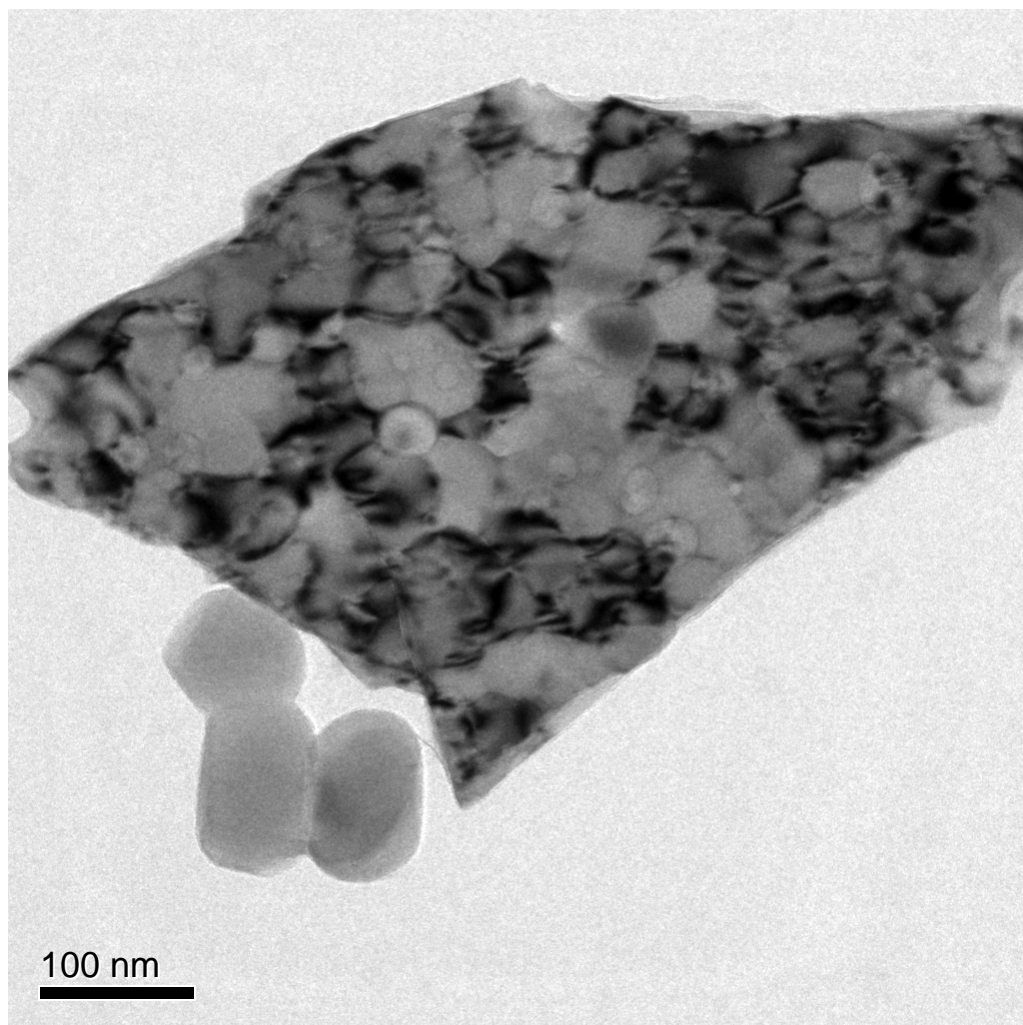



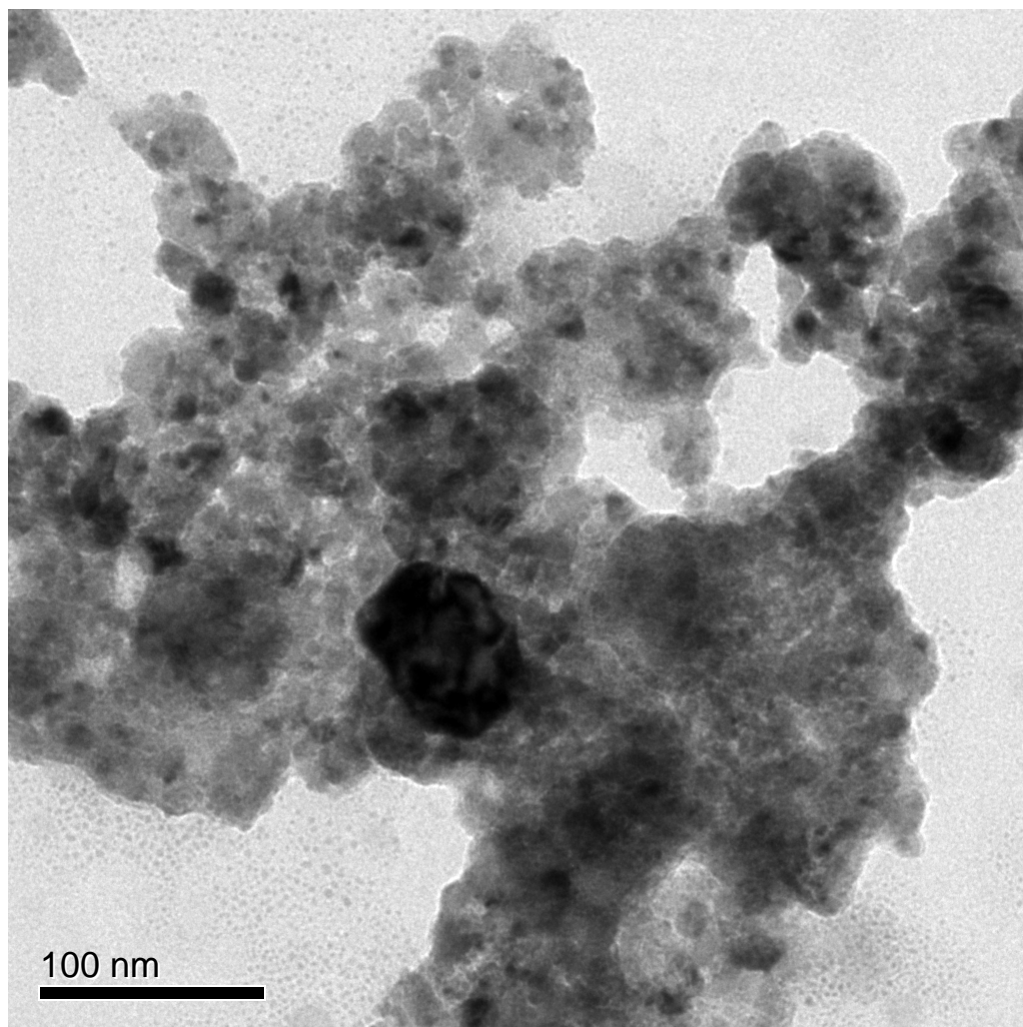

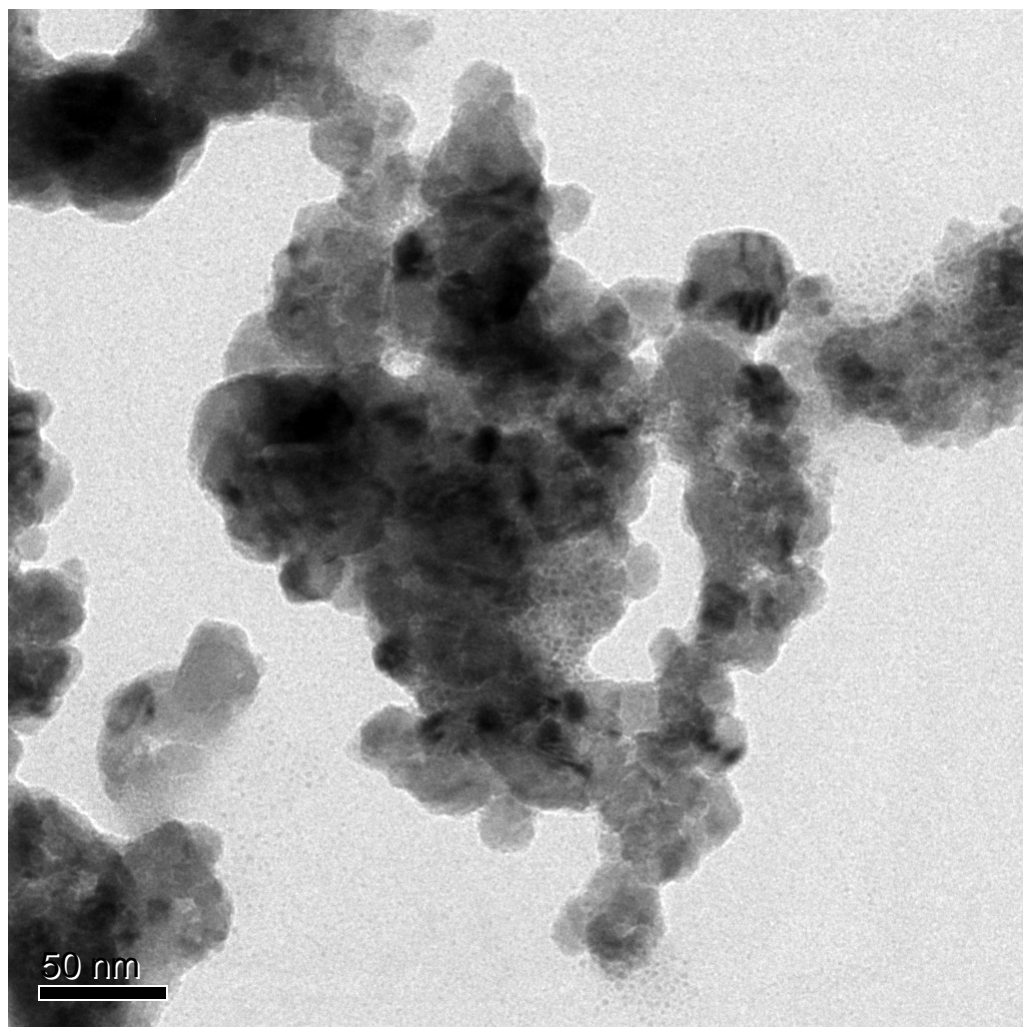

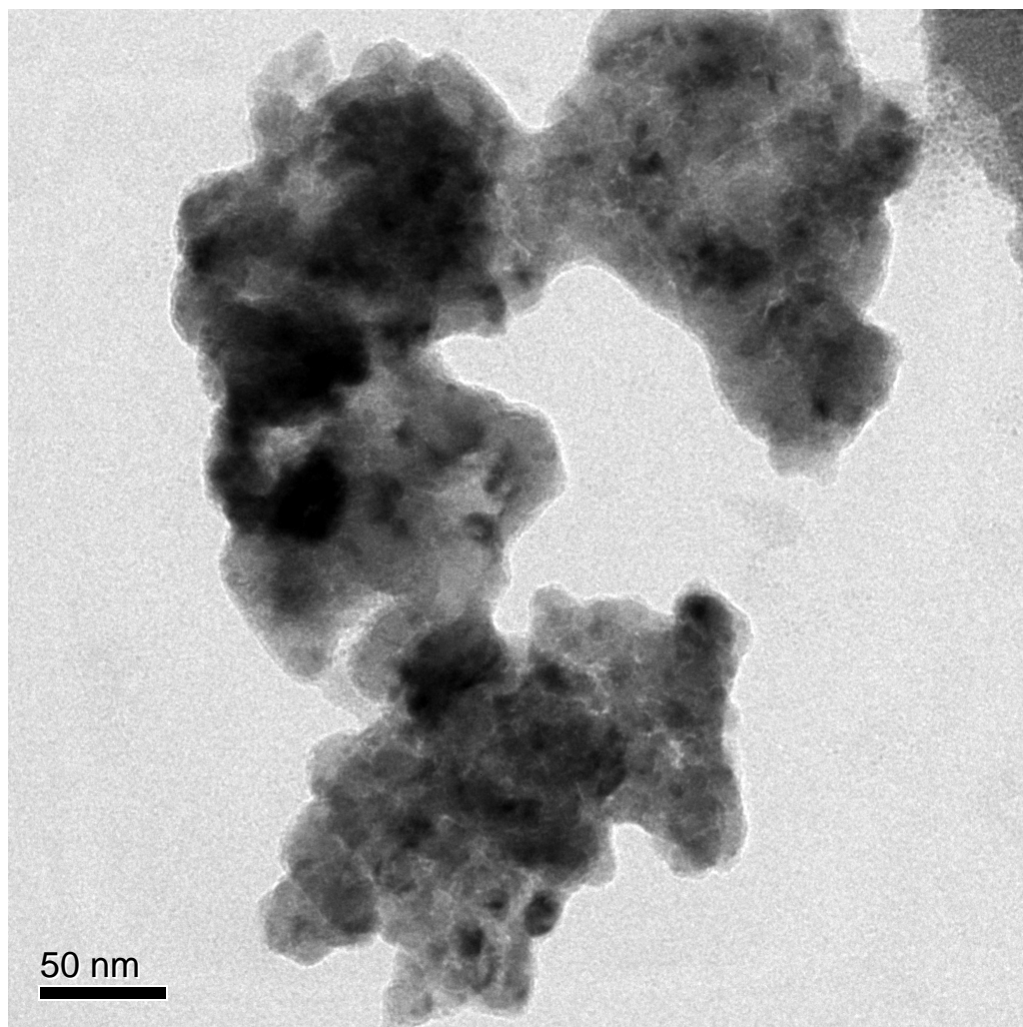



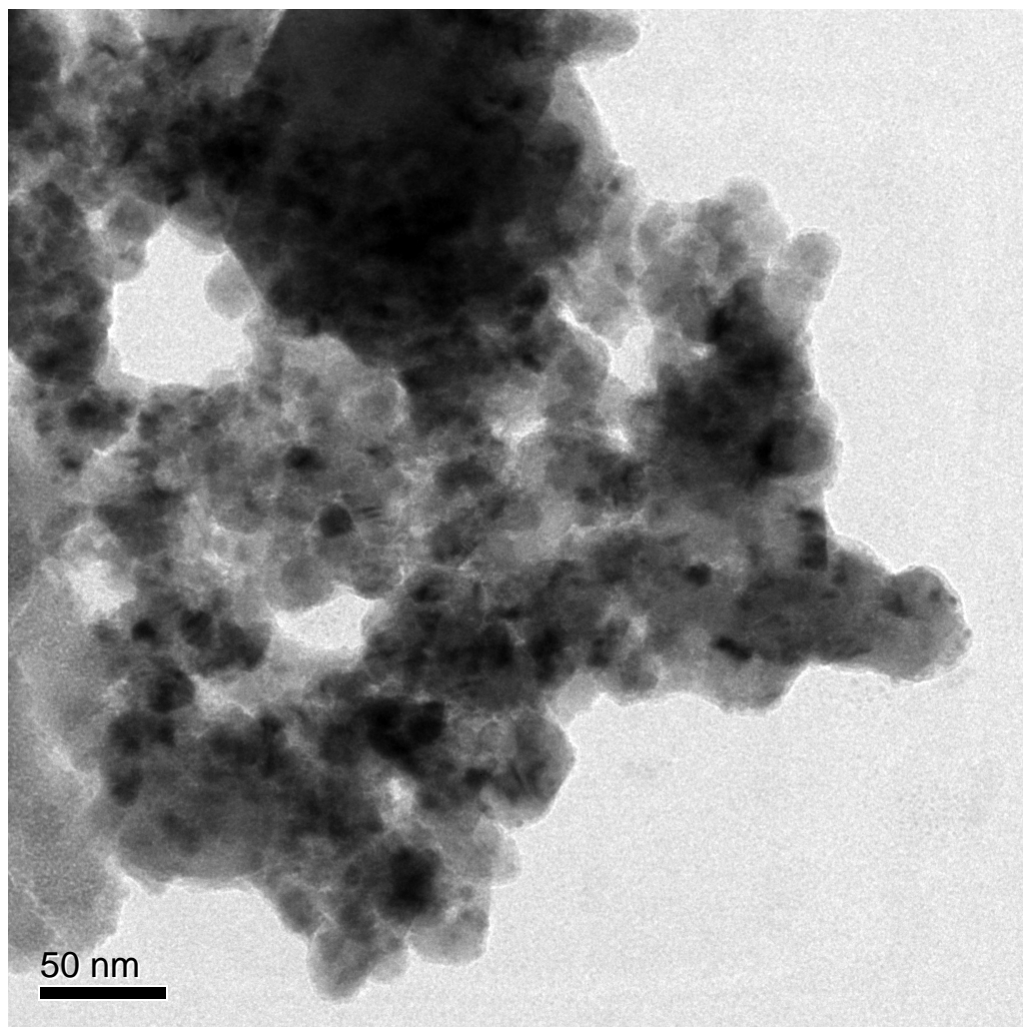



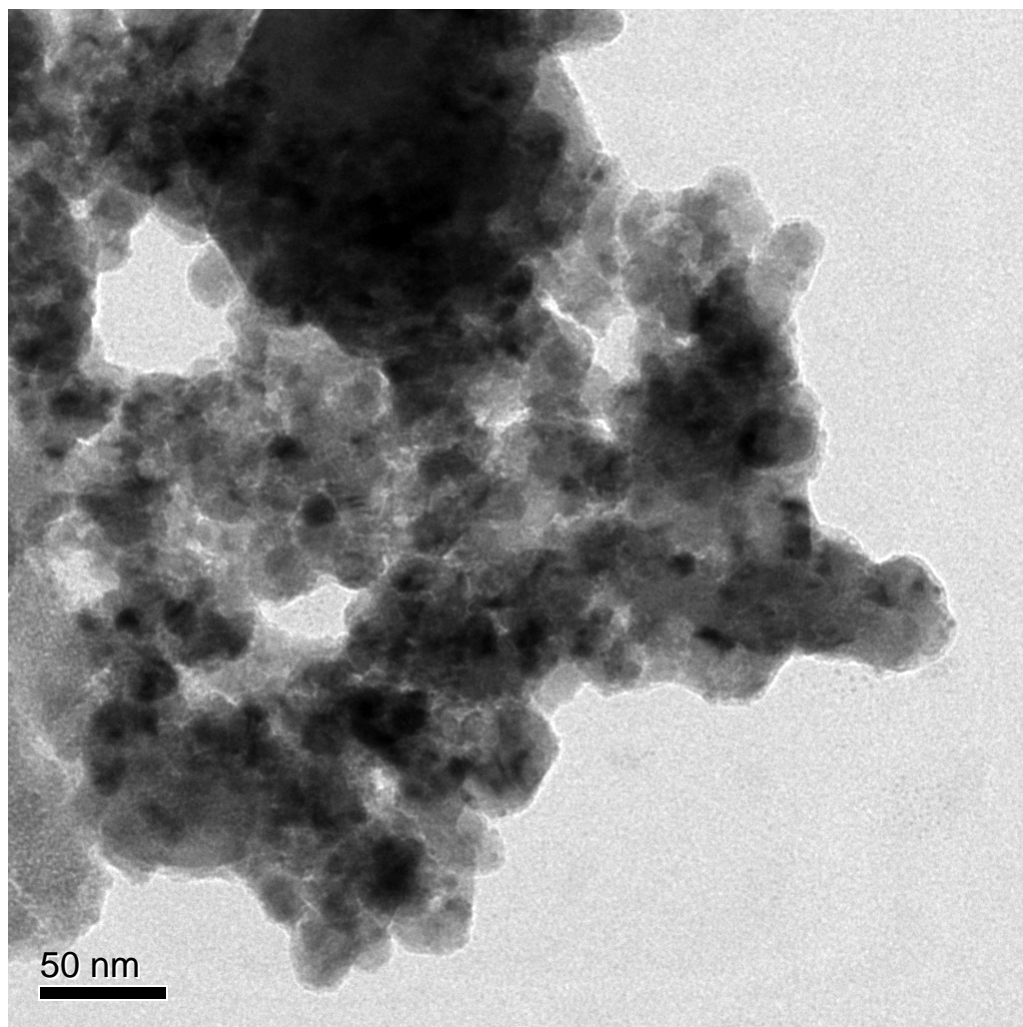

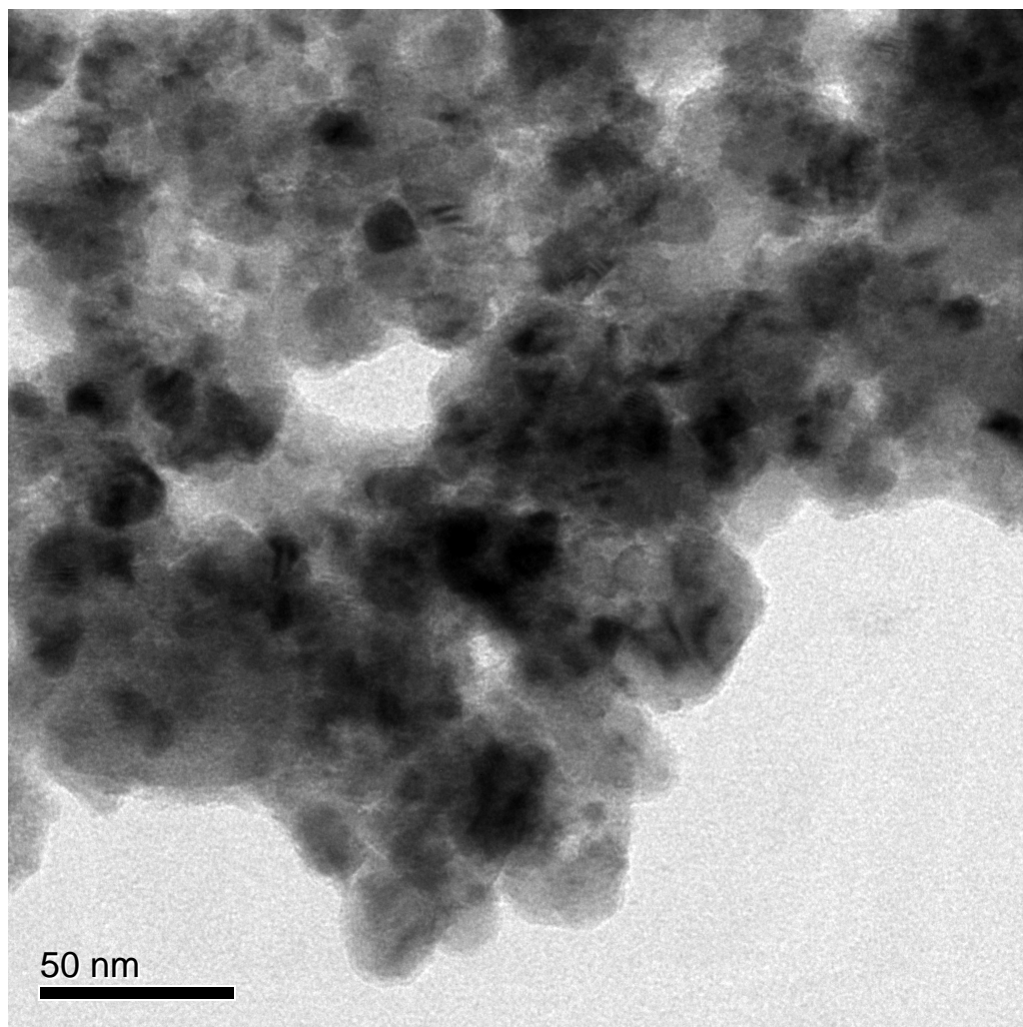

Supplement: c2ra20371e.pdf [file c2ra20371e.pdf]
